Monitoring sodium content in packaged foods sold in the Americas and compliance with the PAHO 2021 regional sodium targets

## 1 **Monitoring sodium content in packaged foods sold in the Americas and compliance with** 2 **the Updated Regional Sodium Reduction Targets**

3  
4 Yahan Yang<sup>1</sup>, Nadia Flexner<sup>1</sup>, Maria Victoria Tiscornia<sup>2</sup>, Leila Guarnieri<sup>2</sup>, Adriana Blanco-Metzler<sup>3</sup>,  
5 Hilda Núñez-Rivas<sup>3</sup>, Marlene Roselló-Araya<sup>3</sup>, Paola Arévalo-Rodríguez<sup>4</sup>, Maria Fernanda Kroker-  
6 Lobos<sup>4</sup>, Francisco Diez-Canseco<sup>5</sup>, Mayra Meza-Hernández<sup>5</sup>, Kiomi Yabiku-Soto<sup>5</sup>, Lorena Saavedra-  
7 Garcia<sup>5</sup>, Lorena Allemandi<sup>6</sup>, Leo Nederveen<sup>6</sup>, Mary R. L'Abbé<sup>1\*</sup>

8  
9 <sup>1</sup> Department of Nutritional Sciences, Temerty Faculty of Medicine, University of Toronto, Toronto, Canada.

10 <sup>2</sup> Fundación Interamericana del Corazón Argentina, Buenos Aires, Argentina

11 <sup>3</sup> Costa Rican Institute of Research and Education on Nutrition and Health (INCIENSA), Tres Ríos, Cartago, Costa  
12 Rica.

13 <sup>4</sup> INCAP Research Center for the Prevention of Chronic Diseases, Institute of Nutrition of Central America and  
14 Panama, Guatemala City, Guatemala.

15 <sup>5</sup> CRONICAS Center of Excellence in Chronic Diseases, Universidad Peruana Cayetano Heredia, Lima, Peru.

16 <sup>6</sup> Pan American Health Organization/World Health Organization, Washington D.C., USA.

17  
18 \*Corresponding author: [mary.labbe@utoronto.ca](mailto:mary.labbe@utoronto.ca)

19  
20 **Keywords:** Sodium reduction, food reformulation, food supply, packaged foods, food policy

### 21 22 **Abstract**

23  
24 **Background:** Sodium reduction is a cost-effective measure to prevent noncommunicable  
25 diseases. The World Health Organization (WHO) established a target of a 30% relative reduction  
26 in mean population intake of sodium by 2025. The Pan American Health Organization (PAHO)  
27 published sodium reduction targets for packaged foods in 2015, expanding and updating the  
28 targets in 2021 to help Member States with its efforts in reducing population sodium intake.

29 **Objective:** This study examined the current sodium levels in packaged foods among five  
30 countries in the Americas and monitored cross-sectional and longitudinal compliance with the  
31 sodium targets from 2015 to 2022.

32 **Methods:** Food labels were systematically collected from the main supermarkets in five  
33 countries in the Americas region in 2022. Sodium levels per 100g and per kcal for collected food  
34 labels in 16 PAHO categories and 75 subcategories were analyzed and compared against the  
35 Updated Regional Targets. Further analysis of three countries that have longitudinal data for  
36 2015-2016, 2017-2018 and 2022 was conducted to compare sodium per 100 g against the 2015  
37 PAHO Targets.

38 **Results:** A total of 25,569 food items were analyzed. Overall, '*processed meat and poultry*' had  
39 the highest sodium levels, although there were large variations within categories. 47% and 45%  
40 of products met the sodium per 100g and per kcal 2022 targets, respectively. Peru had the highest  
41 compliance, whereas Panama had the lowest for both targets. Among Argentina, Costa Rica and  
42 Peru, the proportion of foods meeting the 2015 PAHO lower targets were 48, 53 and 61% for  
43 2015-2016, 2017-2018 and 2022, respectively.

44 **Conclusions:** This study showed that around half of the examined foods met their respective  
45 sodium targets and there have been small improvements in compliance over time. Further efforts  
46 are required to reach the WHO's global sodium reduction goal by 2025, such as implementation  
47 of mandatory sodium reduction targets and front-of-pack labelling regulations.

## 48 1. Introduction

49 Hypertension is one of the major risk factors for cardiovascular diseases (CVDs) and it has been  
50 estimated to account for 10.8 million deaths globally in 2019<sup>1,2</sup>. The number of adults with  
51 hypertension has been increasing in the past few decades, with more than 1 billion adults  
52 affected by hypertension in 2019, globally<sup>3</sup>. It has been well demonstrated that excessive  
53 consumption of sodium is a significant causal risk factor for the development of hypertension  
54 and reducing dietary sodium can have a favorable effect on the cardiovascular system<sup>4</sup>. The  
55 World Health Organization (WHO) published a guideline in 2012 recommending less than 5g of  
56 salt (2g of sodium) intake per day for adults<sup>5</sup>. However, the global average salt intake in 2019  
57 was estimated to be more than double the recommendation at 10.8g of salt (4.3g of sodium) per  
58 day<sup>1</sup>.

59  
60 In 2013, WHO established an action plan that included reducing salt intake by 30% by 2025 and  
61 all 194 Member States signed up<sup>6</sup>. A series of interventions had been proposed, including  
62 reformulation of foods to contain less sodium, establishing public food procurement policies to  
63 limit foods high in sodium, using front-of-package labelling that inform consumers of high  
64 sodium products and using mass media campaigns to reduce sodium intake<sup>7</sup>. However, a report  
65 released in early 2023 showed that the world is off-track to achieve this global target, with only  
66 5% of countries (Brazil, Chile, Czech Republic, Lithuania, Malaysia, Mexico, Saudi Arabia,  
67 Spain and Uruguay) implementing at least two mandatory and comprehensive sodium reduction  
68 policies and all WHO sodium-related ‘best buys’<sup>1</sup>.

69  
70 To support the Americas region in accomplishing the global target, the Pan American Health  
71 Organization (PAHO) published a set of regional sodium reduction targets (2015 PAHO targets)  
72 in 2015 for 18 food categories that were commonly sold in the region<sup>8</sup>. In 2019, a study  
73 examined the sodium levels in packaged foods sold in 14 Latin American and Caribbean  
74 countries (LAC) according to the 2015 PAHO targets. The study found 82% compliance with the  
75 regional target and 47% compliance with the lower and stricter targets<sup>9</sup>. The regional target level  
76 was the maximum level (mg/100g) or upper limit, whereas food manufacturers were encouraged  
77 to reach the lower target level that is reflective of the average level in reference countries<sup>8</sup>. A  
78 later study published in 2021 showed that compliance with regional targets increased from 83%  
79 to 89% from 2015-2016 to 2017-2018 among four Latin American countries<sup>10</sup>. Therefore,  
80 PAHO updated the targets in 2021 to set stronger regional sodium reduction targets for 2022 and  
81 2025 (2022 and 2025 PAHO targets) which are similar to the 2015 PAHO lower targets, and it  
82 further categorized foods into 16 main categories and 75 subcategories<sup>11,12</sup>. Similarly, WHO  
83 published global benchmarks, defined as the lowest maximum value for each subcategory from  
84 existing national or regional targets, for sodium levels in foods across different food categories<sup>13</sup>.  
85 However, there has been no further follow-up study monitoring sodium levels in packaged foods  
86 in the Americas since 2018. Thus, the objectives of this study were to 1) examine the current  
87 sodium levels among five countries in the Americas (Argentina, Canada, Costa Rica, Panama,  
88 and Peru), as well as monitor compliance with the Updated Regional Sodium Reduction Targets  
89 for 2022; and 2) monitor the progress of sodium reduction among three Latin American countries  
90 that have longitudinal data.

## 91 2. Methods

93 This cross-sectional study was conducted using data from five countries: Argentina, Canada,  
94 Costa Rica, Panama, and Peru. Data from the Nutrition Facts table (NFt) (n=44,570) were  
95 collected in supermarkets in Argentina (n=4,340), Costa Rica (7,402), Panama (n=1,509) and  
96 Peru (n=5,378) between March and August 2022. The Food Label Information Program for Latin  
97 America and Caribbean countries (FLIP-LAC) was used for data collection and analyses. FLIP-  
98 LAC is a smartphone-based technology and web database, and the methodology was developed  
99 by The University of Toronto (U of T)<sup>14</sup>. The Canadian data (n=25,941) were extracted from the  
100 Food Label Information and Price (FLIP) database collected in 2020<sup>14</sup>.

101  
102 Foods were classified into 16 major categories and 75 subcategories described in the Updated  
103 PAHO Regional Sodium Reduction Targets<sup>12</sup>. The updated PAHO target categorization was  
104 individually completed by each country team and the U of T research team validated the results  
105 and resolved discrepancies with country team members. The sodium content was standardized  
106 into mg/100g and mg/kcal where data were available. Foods excluded from the analyses included  
107 duplicated items, foods that could not be categorized under the PAHO categories (n=19,001),  
108 and foods that have 0 kcal were additionally excluded from the mg/kcal analysis, due to  
109 mathematical restrictions (n=387). Summary statistics were calculated for food products by food  
110 categories and by country. The sodium level was compared against the Updated PAHO Regional  
111 Sodium Reduction Targets (**Appendix A**) to determine the proportion of foods that met or  
112 exceeded the target level set for 2022.

113  
114 Since three countries in this study had baseline data from 2015-2016 and 2017-2018, categorized  
115 under the 2015 PAHO targets, a further sub-analysis was conducted by categorizing the foods  
116 collected in 2022 from Argentina, Costa Rica and Peru into the 2015 PAHO target categories (18  
117 food categories)<sup>8</sup>. Sodium levels were compared against the 2015 PAHO regional (upper) target  
118 level as well as the lower target level. Proportion of foods meeting the regional targets was  
119 compared among the three timepoints. All analyses were conducted with R studio (5.12.10) and  
120 Microsoft Excel (2016).

### 121 122 **3. Results**

123 After exclusions, this study included a total of 25,569 items across 16 PAHO sodium reduction  
124 main categories and 75 subcategories (Argentina n=2,515, Canada n=15,268, Costa Rica  
125 n=3,875, Panama n=1,121, and Peru n=2,790).

#### 126 127 *3.1 Sodium levels per 100g and per kcal by PAHO categories*

128 Of the 23,663 foods that had sodium per 100g available, '*processed meat and poultry*' and  
129 '*saucers, dips, gravy, and condiments*' had the highest median sodium levels per 100g (both at  
130 800mg/100g), followed by '*fats and oils*' (720mg/100g) (**Table 1**). The variations within  
131 categories were high, particularly among '*saucers, dips, gravy and condiments*' (SD =  
132 5,733mg/100g), '*processed fish and seafood*' (SD = 972mg/100g) and '*processed vegetables,*  
133 '*beans and legumes*' (SD = 599mg/100g). There were variations between the median sodium  
134 levels between countries, with the largest variation within '*saucers, dips, gravy, and condiments*',  
135 '*soy products and meat alternatives*' and '*processed meat and poultry*'. The lowest variation  
136 between countries was within '*fresh or dried plain pasta and noodles*', '*processed fish and*  
137 '*seafood*' and '*ready-made foods*'.

138

Monitoring sodium content in packaged foods sold in the Americas and compliance with the PAHO 2021 regional sodium targets

139 Of the 23,236 foods that had sodium per kcal data available, ‘*saucers, dips, gravy, and*  
140 *condiments*’, ‘*soups*’ and ‘*processed vegetables, beans, and legumes*’ have the highest median  
141 sodium level per kcal of 7.8mg/kcal, 6.0mg/kcal and 5.1mg/kcal, respectively (**Table 2**). The  
142 lowest median sodium levels per kcal were among ‘*fresh or dried plain pasta and noodles*’  
143 (0mg/kcal), ‘*granola and energy bars and nut butters/spreads*’ (0.5mg/kcal) and ‘*cakes, biscuits,*  
144 *pastries, and sweet breads*’ (0.7mg/kcal). The largest variations between countries were found  
145 among ‘*saucers, dips, gravy and condiments*’, ‘*soups*’ and ‘*soy products and meat alternatives*.  
146 Variation within category was highest among ‘*saucers, dips, gravy, and condiments*’  
147 (SD=41.4mg/kcal), ‘*processed vegetables, beans and legumes*’ (SD=20.2mg/kcal) and ‘*soups*’  
148 (SD=17.8mg/kcal).

### 149 [3.2 Proportion of foods meeting the 2022 PAHO regional sodium targets by categories and](#) 150 [country](#)

152 Overall, 11,037 of 23,663 (47%) analyzed foods met their respective 2022 PAHO sodium targets  
153 (mg/100g). Peru and Argentina had the highest proportion of compliance (52% and 50%,  
154 respectively), whereas Panama had the lowest (36%) (**Fig 1**). By food category, the highest  
155 proportion of products meeting the regional target was among ‘*ready-made foods*’ (77%),  
156 ‘*processed meat and poultry*’ (53%) and ‘*cheese*’ (50%). The lowest proportion of foods meeting  
157 the regional target was among ‘*bread products*’ (30%), ‘*granola and energy bars and nut*  
158 *butters/spreads*’ (37%) and ‘*processed fish and seafood*’ (41%). The largest variation between  
159 countries was observed in ‘*soy products and meat alternatives*’ (range: 28% to 85%) and ‘*soups*’  
160 (range: 31% to 54%) (**Table 3**).

161  
162 **Fig 1.** Proportion of products meeting the updated 2022 PAHO Sodium Targets – by country

163  
164 With respect to the PAHO targets for sodium levels per kcal, 10,304 of 23,000 (45%) foods met  
165 their respective sodium targets (mg/kcal). Peru had the highest proportion of compliance (52%),  
166 followed by Costa Rica (48%), whereas Panama only had 37% compliance (**Table 4**). By  
167 category, the highest proportion of products meeting the regional target was among ‘*savoury*  
168 *snacks*’ (71%), ‘*soups*’ (67%) and ‘*corn derivatives*’ (67%). The lowest proportion of foods  
169 meeting the regional target was among ‘*bread products*’ (31%), ‘*cheese*’ (35%) and ‘*ready-made*  
170 *foods*’ (35%). The largest variation between countries was observed in ‘*soy products and meat*  
171 *alternatives*’ (range: 33% to 80%) and ‘*fresh or dried plain pasta and noodles*’ (range: 16% to  
172 55%) (**Table 4**).

### 173 174 [3.3 Changes in the proportion of foods meeting the old 2015 PAHO sodium targets](#)

175 The longitudinal analysis included a total of 10,571 foods, of which 2,915 foods were from the  
176 2015-2016 collection, 3,241 foods were from the 2017-2018 collection, and 4,415 foods were  
177 from the 2022 collection (countries: Argentina, Costa Rica, and Peru) across 18 2015 PAHO  
178 sodium food categories (**Fig 2**). Overall, the proportion of foods meeting the 2015 PAHO sodium  
179 regional target among the three countries was 82, 88 and 90% for 2015-2016, 2017-2018 and  
180 2022, respectively (**Fig 2A**). The proportion of foods meeting the 2015 PAHO lower targets were  
181 48, 53 and 61% for 2015-2016, 2017-2018 and 2022 (**Fig 2B**). There was an increase in the  
182 proportion of items meeting the regional targets, with a 9, 9 and 5% increase from 2015-2022 for  
183 Argentina, Costa Rica, and Peru, respectively (**Fig 3**).

184

185 **Fig 2.** A) Proportion of products meeting the PAHO 2015 Regional Sodium Targets from 2015  
186 to 2022 (Argentina, Costa Rica, Peru) – overall; B) Proportion of products meeting the PAHO  
187 2015 Lower Sodium Targets from 2015 to 2022 (Argentina, Costa Rica, Peru) – overall

188  
189 **Fig 3.** Proportion of products meeting the 2015 PAHO Sodium Targets – by country (2015 –  
190 2022)

#### 191 192 **4. Discussion**

193 This study provides an up-to-date assessment of sodium levels in packaged foods sold in five  
194 countries in the Americas, after the publication of the Updated PAHO Regional Sodium  
195 Reduction Targets in 2021<sup>12</sup>. The results showed that the proportion of foods meeting the older  
196 2015 PAHO sodium regional targets has gradually increased from 82% to 90%. However, the  
197 progress is slow and there still needs to be improvement in compliance with the Updated Sodium  
198 Reduction Targets. Further accelerated actions are needed for the achievement of sodium  
199 reduction goals. These data shed light into the progress in different countries in the Region  
200 towards the current sodium reduction interventions aligned with recommendations from the  
201 WHO's SHAKE technical package for sodium reduction<sup>15</sup> and other initiatives to reach the 2025  
202 global target of a 30% relative reduction in mean population intake of sodium.

203  
204 *'Processed meat and poultry'* and *'sauces, dips, gravy, and condiments'* have the highest median  
205 sodium levels per 100g. This result is consistent with the previous regional study<sup>9</sup> that showed a  
206 similar median sodium level for *'processed meats'* and a lower median sodium level in  
207 *'sauces/condiments'*. In addition to the sodium level by weight, sodium density (mg/kcal)  
208 accounts for the variation in energy consumption and has been shown to be more strongly  
209 associated with blood pressure than total intake<sup>16</sup>. Our results show that *'sauces, dips, gravy, and*  
210 *condiments'*, *'soups'* and *'processed vegetables, beans, and legumes'* had the highest sodium  
211 density. These results are expected, as these food categories have lower energy density. Overall,  
212 the results also showed large variations within food categories, suggesting that lower sodium  
213 options are available among different foods and showing the technical feasibility of reducing  
214 sodium levels in these categories. This is important, as it highlights the importance of combining  
215 other strategies, such as front-of-pack labels to help consumers identify lower sodium options,  
216 social marketing campaigns to encourage consumers to select lower sodium foods, marketing  
217 restrictions to products with high sodium contents and nutrition standards for foods and  
218 beverages available in schools and other settings, to disincentivize consumption of such  
219 products. However, the high average and median sodium levels in many categories also  
220 suggested that governments need to encourage sodium reduction at the manufacturer level  
221 through food reformulation by setting mandatory sodium reduction targets for key food  
222 categories.

223  
224 When examining the compliance in 2022 with the updated regional targets, almost half of the  
225 analyzed foods met their respective sodium targets (mg/100g). This proportion is the same as the  
226 previously reported compliance (47%) with the 2015 lower target (which is lower, if not the  
227 same, as the 2022 regional target)<sup>9</sup>, suggesting a small increase in the number of foods meeting  
228 the targets or the introduction of new low sodium alternative products. The compliance rate  
229 between countries was similar, except for Panama (36%). However, this needs careful  
230 interpretation due to the different stages at which each country is in its efforts to reduce sodium.

231 On examination of the longitudinal progress of Argentina, Costa Rica and Peru, there was an 8%  
232 increase in compliance when compared to the 2015 regional target (82% to 90%) and an 13%  
233 increase when compared to the 2015 lower target (48% to 61%). While this may indicate some  
234 progress, it remains insufficient to achieve the target of a 30% relative reduction in mean  
235 population intake of sodium by 2025. Therefore, stronger measures and greater compliance with  
236 the set targets are needed.

237  
238 These five countries each have national-level policies supporting sodium reduction. For example,  
239 Argentina included sodium maximum levels for certain food groups by passing Act 26905 in  
240 2014 and there were education campaigns and restaurant policies to reduce sodium intake<sup>17</sup>.  
241 There was also ongoing monitoring of Argentina's sodium content in foods. Studies in 2017-  
242 2018 and 2022 showed that over 90% and 94% of surveyed food products, respectively,  
243 complied with the national sodium reduction law<sup>18,19</sup>. However, this suggests that the current  
244 local limits are too lax compare with the regional targets and require further adjustment; and the  
245 necessity to include sodium source food groups that are currently not included, such as cheese  
246 and puff pastries<sup>20</sup>.

247  
248 While Costa Rica has a voluntary sodium reduction strategy to reduce sodium levels in some key  
249 food categories, progress has been monitored continuously<sup>21-23</sup>. A study published by Vega-  
250 Solano et al. in 2019 showed 87% compliance with the voluntary national sodium targets. In the  
251 case of Peru, there is no specific national sodium reduction strategy in place; however, Peru  
252 implemented 'high in' FOPL regulations in 2019 that requires foods exceeding established  
253 thresholds for nutrients of concern (i.e., sugar, saturated fat, trans fat, and sodium) to display a  
254 'high in' symbol<sup>24</sup>. This law could indirectly motivate food industry to reformulate products to  
255 avoid a 'high in' symbol, as already seen in Peru and other countries<sup>25,26</sup>. Canada published a  
256 voluntary sodium reduction guideline for prepackaged foods in 2012 and updated the targets in  
257 2020<sup>27,28</sup>. Evaluations of this initiative have shown minimal progress over time, with only 14%  
258 of food categories meeting sodium reduction targets in 2017<sup>29</sup>. Panama has recently launched a  
259 national plan to reduce sodium intake (2022-2025)<sup>30</sup>.

260  
261 Overall, these interventions aiming to reduce sodium intake by encouraging food reformulations  
262 could have important public health impacts, as several simulation studies found that an important  
263 number of CVDs could have been prevented or delayed if the reformulation targets or sodium  
264 guidelines would have been met<sup>31-34</sup>. Worth noting that mandatory policies have shown to be  
265 more effective than voluntary initiatives<sup>35,36</sup>. For instance, a recent evaluation in South Africa,  
266 one of the fewest countries with mandatory sodium levels for key food categories, showed a  
267 reduction in salt intake of 1.15 g/day during the first phase of the program (2015-2019), a  
268 significant reduction in population-level sodium intake, while other voluntary initiatives in  
269 countries like Brazil and Canada have shown only modest results in meeting sodium reduction  
270 targets<sup>29,37</sup>. Given the slow progress in meeting regional sodium reduction targets, our results  
271 highlight the importance of establishing and monitoring effective and feasible mandatory sodium  
272 reduction targets to prevent diet-related NCD deaths.

273  
274 This study has both strengths and limitations that should be considered when interpreting our  
275 findings. Variations in sampling sizes among countries could potentially influence the overall  
276 study results. Therefore, a detailed examination of variations within each country at the

Monitoring sodium content in packaged foods sold in the Americas and compliance with the PAHO 2021 regional sodium targets

277 subcategory level would be necessary, although out of the scope of this analysis. However, we  
278 do provide results of progress relative to the PAHO targets, at the major category level for each  
279 country. Furthermore, the data in this study were based on Nutrition facts table (NfT)  
280 information, with a permitted variation margin of 20% when reporting nutrient values in NfTs.  
281 Additionally, several products per country were excluded due to the absence of sodium level  
282 declarations on food labels, as some countries within the region lack mandatory nutrient values  
283 declaration. Regional comparison at different time points was limited to only three countries,  
284 including other countries in future analyses will provide a more comprehensive assessment at the  
285 regional level. However, this regional analysis benefited from the utilization of common  
286 methodologies across countries (e.g., data collection, data cleaning, and analysis). Additionally,  
287 several quality assurance measures were performed including food category categorization and  
288 validation, outlier check and Atwater validation. Furthermore, prices of products were not  
289 included in this study. To ensure the decrease in sodium content is not driven by the lower  
290 sodium products that might be higher in price (which likely will not target the majority of  
291 population), future studies should also consider including sales-weighted average sodium levels  
292 to account for the actual sales of foods sampled.

## 293 294 **5. Conclusion**

295 Overall, this study provides an ongoing surveillance of the sodium content in package foods sold  
296 in five countries in the Americas, under key food categories of the Updated PAHO Regional  
297 Sodium Reduction Targets. Around half of the examined foods met their respective sodium  
298 targets and there has been some improvement in the compliance overtime, although the  
299 reductions have been modest at best. Further efforts are required to reach the WHO's global  
300 sodium reduction goal by 2025, such as implementation of national mandatory sodium reduction  
301 targets, reformulation guidelines, FOPL regulations, marketing restrictions, social marketing  
302 campaigns, and nutrition standards in schools and other settings, among others. Moreover, there  
303 is a need to transform the food systems and promote a healthy diet based on unprocessed or  
304 minimally processed foods, rather than ultraprocessed foods.

Monitoring sodium content in packaged foods sold in the Americas and compliance with the PAHO 2021 regional sodium targets

305 **Conflict of interest**

306 The authors declare that the research was conducted in the absence of any commercial or  
307 financial relationships that could be construed as a potential conflict of interest.

308

309 **Authors' contributions**

310 YY, NF, VT, LG, ABM, HNR, MRA, PAR, MFKL, FDC, MMH, KYS, LSG, LA, LN and MRL  
311 conceptualized the study design; YY, NF, VT, LG, ABM, HNR, MRA, PAR, MFKL, FDC,  
312 MMH, KYS, LSG, LA, LN and MRL interpreted the findings; YY, NF VT, LG, ABM, HNR,  
313 MRA, PAR, MFKL, FDC, MMH, KYS, and LSG conducted the study; YY and NF wrote the  
314 original draft; YY performed the statistical analysis. All authors critically reviewed and approved  
315 the final manuscript.

316

317 **Funding**

318 This research was funded by the Canadian Institutes of Health Research (PJT-152979), Pan  
319 American Health Organization (PAHO/WHO) and Resolve to Save Lives.

320

321 **Acknowledgments**

322 The authors would like to express their gratitude to Alyssa Schermel for her support to country  
323 teams with the FLIP-LAC application and platform. Also, to country team members Luciana  
324 Castronuovo (Argentina) and Ana Atencio (Panama) for their contributions throughout the  
325 project.



326 Tables:

327 Table 1. Distribution of sodium content per 100g/ml of packaged foods per PAHO food category at the regional level and by country

| Category                                              | Country         | Products (n) | Mean       | SD         | Minimum  | q25        | Median     | q75        | Maximum     |
|-------------------------------------------------------|-----------------|--------------|------------|------------|----------|------------|------------|------------|-------------|
| <b>1. Bread, bread products and crisp breads</b>      | <b>Regional</b> | <b>1564</b>  | <b>504</b> | <b>309</b> | <b>0</b> | <b>364</b> | <b>467</b> | <b>600</b> | <b>5300</b> |
|                                                       | Argentina       | 226          | 476        | 288        | 0        | 365        | 457        | 608        | 2902        |
|                                                       | Canada          | 1019         | 514        | 233        | 0        | 375        | 483        | 600        | 1700        |
|                                                       | Costa Rica      | 188          | 551        | 615        | 0        | 291        | 473        | 658        | 5300        |
|                                                       | Panama          | 44           | 527        | 154        | 240      | 444        | 500        | 592        | 1040        |
|                                                       | Peru            | 87           | 354        | 113        | 40       | 311        | 365        | 396        | 676         |
| <b>2. Cakes, biscuits, pastries, and sweet breads</b> | <b>Regional</b> | <b>3530</b>  | <b>371</b> | <b>269</b> | <b>0</b> | <b>191</b> | <b>308</b> | <b>469</b> | <b>2600</b> |
|                                                       | Argentina       | 626          | 316        | 254        | 0        | 129        | 251        | 430        | 2110        |
|                                                       | Canada          | 2028         | 400        | 280        | 0        | 224        | 326        | 500        | 2600        |
|                                                       | Costa Rica      | 512          | 348        | 248        | 0        | 179        | 280        | 442        | 1214        |
|                                                       | Panama          | 99           | 415        | 313        | 34       | 201        | 354        | 537        | 1667        |
|                                                       | Peru            | 265          | 303        | 190        | 0        | 179        | 267        | 367        | 1063        |
| <b>3. Corn derivatives</b>                            | <b>Regional</b> | <b>58</b>    | <b>476</b> | <b>447</b> | <b>0</b> | <b>103</b> | <b>349</b> | <b>834</b> | <b>1600</b> |
|                                                       | Costa Rica      | 43           | 513        | 487        | 0        | 75         | 396        | 847        | 1600        |
|                                                       | Panama          | 8            | 348        | 336        | 15       | 115        | 272        | 479        | 983         |
|                                                       | Peru            | 7            | 399        | 270        | 63       | 343        | 344        | 368        | 960         |
| <b>4. Breakfast cereal</b>                            | <b>Regional</b> | <b>1089</b>  | <b>294</b> | <b>223</b> | <b>0</b> | <b>98</b>  | <b>283</b> | <b>442</b> | <b>2388</b> |
|                                                       | Argentina       | 87           | 232        | 177        | 0        | 77         | 240        | 323        | 810         |
|                                                       | Canada          | 617          | 325        | 234        | 0        | 105        | 364        | 500        | 2388        |
|                                                       | Costa Rica      | 195          | 278        | 206        | 0        | 113        | 268        | 374        | 1307        |
|                                                       | Panama          | 48           | 339        | 215        | 0        | 205        | 350        | 408        | 1133        |
|                                                       | Peru            | 142          | 202        | 187        | 0        | 18         | 183        | 347        | 775         |
| <b>5. Savoury snacks</b>                              | <b>Regional</b> | <b>1692</b>  | <b>545</b> | <b>354</b> | <b>0</b> | <b>305</b> | <b>500</b> | <b>731</b> | <b>3000</b> |
|                                                       | Argentina       | 143          | 602        | 250        | 0        | 429        | 604        | 780        | 1292        |
|                                                       | Canada          | 962          | 556        | 348        | 0        | 326        | 520        | 724        | 3000        |
|                                                       | Costa Rica      | 336          | 516        | 390        | 0        | 202        | 445        | 720        | 2467        |

| Category                                           | Country         | Products (n) | Mean       | SD         | Minimum  | q25        | Median     | q75         | Maximum     |
|----------------------------------------------------|-----------------|--------------|------------|------------|----------|------------|------------|-------------|-------------|
|                                                    | Panama          | 92           | 646        | 467        | 27       | 358        | 532        | 842         | 2491        |
|                                                    | Peru            | 159          | 434        | 276        | 19       | 266        | 359        | 577         | 1434        |
| <b>6. Cheese</b>                                   | <b>Regional</b> | <b>1813</b>  | <b>696</b> | <b>421</b> | <b>0</b> | <b>475</b> | <b>667</b> | <b>800</b>  | <b>7143</b> |
|                                                    | Argentina       | 256          | 642        | 425        | 0        | 346        | 577        | 877         | 3300        |
|                                                    | Canada          | 1167         | 698        | 385        | 0        | 500        | 667        | 767         | 3400        |
|                                                    | Costa Rica      | 214          | 717        | 584        | 0        | 506        | 641        | 889         | 7143        |
|                                                    | Panama          | 68           | 898        | 423        | 32       | 634        | 780        | 1253        | 1800        |
|                                                    | Peru            | 108          | 629        | 348        | 10       | 398        | 608        | 800         | 1800        |
| <b>7. Processed vegetables, beans, and legumes</b> | <b>Regional</b> | <b>1976</b>  | <b>546</b> | <b>599</b> | <b>0</b> | <b>168</b> | <b>326</b> | <b>767</b>  | <b>4400</b> |
|                                                    | Argentina       | 151          | 677        | 875        | 0        | 73         | 240        | 1148        | 2885        |
|                                                    | Canada          | 1244         | 539        | 582        | 0        | 153        | 324        | 767         | 4333        |
|                                                    | Costa Rica      | 394          | 519        | 508        | 0        | 220        | 346        | 640         | 3500        |
|                                                    | Panama          | 109          | 521        | 657        | 0        | 232        | 280        | 460         | 4400        |
|                                                    | Peru            | 78           | 577        | 536        | 4        | 200        | 360        | 929         | 2300        |
| <b>8. Processed meat and poultry</b>               | <b>Regional</b> | <b>1776</b>  | <b>896</b> | <b>567</b> | <b>0</b> | <b>527</b> | <b>800</b> | <b>1036</b> | <b>5460</b> |
|                                                    | Argentina       | 178          | 962        | 747        | 46       | 593        | 753        | 1036        | 5460        |
|                                                    | Canada          | 1210         | 881        | 506        | 0        | 511        | 800        | 1026        | 3143        |
|                                                    | Costa Rica      | 184          | 1071       | 759        | 5        | 722        | 908        | 1225        | 4800        |
|                                                    | Panama          | 91           | 790        | 394        | 96       | 626        | 769        | 969         | 2495        |
|                                                    | Peru            | 113          | 763        | 546        | 198      | 335        | 600        | 900         | 2640        |
| <b>9. Processed fish and seafood</b>               | <b>Regional</b> | <b>946</b>   | <b>514</b> | <b>972</b> | <b>0</b> | <b>255</b> | <b>354</b> | <b>487</b>  | <b>9940</b> |
|                                                    | Argentina       | 54           | 541        | 1085       | 0        | 205        | 303        | 457         | 5913        |
|                                                    | Canada          | 579          | 554        | 1132       | 0        | 255        | 368        | 504         | 9940        |
|                                                    | Costa Rica      | 175          | 477        | 681        | 22       | 275        | 345        | 491         | 5938        |
|                                                    | Panama          | 72           | 366        | 178        | 10       | 271        | 360        | 446         | 985         |
|                                                    | Peru            | 66           | 403        | 227        | 70       | 269        | 350        | 450         | 1152        |
| <b>10. Soy products and meat alternatives</b>      | <b>Regional</b> | <b>274</b>   | <b>478</b> | <b>278</b> | <b>0</b> | <b>355</b> | <b>421</b> | <b>577</b>  | <b>1929</b> |
|                                                    | Argentina       | 77           | 382        | 120        | 0        | 328        | 376        | 433         | 784         |

| Category                                                         | Country         | Products (n) | Mean       | SD         | Minimum  | q25        | Median     | q75        | Maximum     |
|------------------------------------------------------------------|-----------------|--------------|------------|------------|----------|------------|------------|------------|-------------|
|                                                                  | Canada          | 116          | 555        | 344        | 0        | 393        | 473        | 632        | 1929        |
|                                                                  | Costa Rica      | 50           | 547        | 236        | 5        | 400        | 539        | 678        | 1375        |
|                                                                  | Panama          | 5            | 204        | 276        | 6        | 12         | 24         | 360        | 620         |
|                                                                  | Peru            | 26           | 339        | 177        | 15       | 301        | 360        | 386        | 680         |
| <b>11. Soups</b>                                                 | <b>Regional</b> | <b>715</b>   | <b>316</b> | <b>302</b> | <b>0</b> | <b>216</b> | <b>276</b> | <b>336</b> | <b>4538</b> |
|                                                                  | Argentina       | 45           | 319        | 138        | 32       | 259        | 285        | 341        | 702         |
|                                                                  | Canada          | 485          | 264        | 125        | 0        | 201        | 260        | 320        | 792         |
|                                                                  | Costa Rica      | 83           | 356        | 358        | 18       | 221        | 309        | 351        | 3250        |
|                                                                  | Panama          | 48           | 303        | 282        | 62       | 188        | 287        | 323        | 1797        |
|                                                                  | Peru            | 54           | 727        | 776        | 97       | 328        | 405        | 953        | 4538        |
| <b>12. Ready-made foods, convenience foods, and mixed dishes</b> | <b>Regional</b> | <b>2133</b>  | <b>412</b> | <b>283</b> | <b>0</b> | <b>254</b> | <b>341</b> | <b>486</b> | <b>3000</b> |
|                                                                  | Argentina       | 144          | 412        | 174        | 31       | 286        | 397        | 519        | 973         |
|                                                                  | Canada          | 1784         | 400        | 260        | 0        | 250        | 333        | 464        | 2050        |
|                                                                  | Costa Rica      | 116          | 493        | 398        | 0        | 160        | 421        | 726        | 1900        |
|                                                                  | Panama          | 24           | 497        | 322        | 0        | 309        | 440        | 749        | 1200        |
|                                                                  | Peru            | 65           | 570        | 589        | 85       | 317        | 380        | 530        | 3000        |
| <b>13. Fresh or dried plain pasta and noodles</b>                | <b>Regional</b> | <b>1108</b>  | <b>20</b>  | <b>101</b> | <b>0</b> | <b>0</b>   | <b>3</b>   | <b>11</b>  | <b>2040</b> |
|                                                                  | Argentina       | 202          | 16         | 35         | 0        | 9          | 10         | 11         | 216         |
|                                                                  | Canada          | 571          | 22         | 99         | 0        | 0          | 0          | 12         | 1789        |
|                                                                  | Costa Rica      | 125          | 32         | 195        | 0        | 0          | 0          | 2          | 2040        |
|                                                                  | Panama          | 39           | 7          | 10         | 0        | 0          | 4          | 11         | 36          |
|                                                                  | Peru            | 171          | 12         | 62         | 0        | 0          | 2          | 5          | 770         |
| <b>14. Granola and energy bars and nut butters/spreads</b>       | <b>Regional</b> | <b>967</b>   | <b>222</b> | <b>146</b> | <b>0</b> | <b>115</b> | <b>221</b> | <b>313</b> | <b>893</b>  |
|                                                                  | Argentina       | 33           | 137        | 119        | 0        | 58         | 104        | 208        | 429         |
|                                                                  | Canada          | 736          | 235        | 140        | 0        | 136        | 232        | 320        | 867         |
|                                                                  | Costa Rica      | 117          | 188        | 170        | 0        | 60         | 182        | 280        | 893         |
|                                                                  | Panama          | 31           | 285        | 138        | 56       | 156        | 281        | 391        | 500         |
|                                                                  | Peru            | 50           | 138        | 122        | 0        | 34         | 83         | 280        | 391         |

| Category                                      | Country         | Products (n) | Mean        | SD          | Minimum  | q25        | Median     | q75         | Maximum      |
|-----------------------------------------------|-----------------|--------------|-------------|-------------|----------|------------|------------|-------------|--------------|
| <b>15. Fats and oils</b>                      | <b>Regional</b> | <b>1044</b>  | <b>718</b>  | <b>435</b>  | <b>0</b> | <b>567</b> | <b>720</b> | <b>867</b>  | <b>11000</b> |
|                                               | Argentina       | 86           | 542         | 472         | 0        | 110        | 629        | 806         | 2520         |
|                                               | Canada          | 692          | 730         | 243         | 0        | 600        | 733        | 867         | 1800         |
|                                               | Costa Rica      | 144          | 736         | 929         | 0        | 415        | 673        | 900         | 11000        |
|                                               | Panama          | 48           | 835         | 235         | 383      | 692        | 817        | 972         | 1867         |
|                                               | Peru            | 74           | 708         | 334         | 0        | 400        | 700        | 884         | 1571         |
| <b>16. Sauces, dips, gravy and condiments</b> | <b>Regional</b> | <b>2978</b>  | <b>3157</b> | <b>5733</b> | <b>0</b> | <b>400</b> | <b>800</b> | <b>2800</b> | <b>36000</b> |
|                                               | Argentina       | 203          | 1946        | 3974        | 0        | 275        | 483        | 1283        | 24000        |
|                                               | Canada          | 2058         | 3149        | 5493        | 0        | 417        | 833        | 3200        | 36000        |
|                                               | Costa Rica      | 341          | 3222        | 6367        | 0        | 385        | 824        | 2333        | 32750        |
|                                               | Panama          | 153          | 4533        | 7137        | 0        | 528        | 1110       | 4550        | 34667        |
|                                               | Peru            | 223          | 3290        | 6874        | 0        | 362        | 681        | 1413        | 32660        |
| <b>Total</b>                                  | <b>Regional</b> | <b>23663</b> | <b>820</b>  | <b>2261</b> | <b>0</b> | <b>233</b> | <b>402</b> | <b>714</b>  | <b>36000</b> |
|                                               | Argentina       | 2511         | 570         | 1286        | 0        | 152        | 360        | 640         | 24000        |
|                                               | Canada          | 15268        | 853         | 2251        | 0        | 256        | 429        | 733         | 36000        |
|                                               | Costa Rica      | 3217         | 782         | 2292        | 0        | 200        | 393        | 721         | 32750        |
|                                               | Panama          | 979          | 1153        | 3194        | 0        | 269        | 460        | 829         | 34667        |
|                                               | Peru            | 1688         | 781         | 2705        | 0        | 172        | 350        | 610         | 32660        |

329 **Table 2.** Distribution of sodium content per kcal of packaged foods, by PAHO category at the regional level and by country

| Category                                              | Country         | Product (n) | Mean       | SD         | Minimum    | q25        | Median     | q75        | Maximum     |
|-------------------------------------------------------|-----------------|-------------|------------|------------|------------|------------|------------|------------|-------------|
| <b>1. Bread, bread products and crisp breads</b>      | <b>Regional</b> | <b>1556</b> | <b>1.7</b> | <b>1.0</b> | <b>0.0</b> | <b>1.2</b> | <b>1.6</b> | <b>2.0</b> | <b>17.7</b> |
|                                                       | Argentina       | 226         | 1.6        | 0.8        | 0.0        | 1.3        | 1.7        | 2.0        | 5.0         |
|                                                       | Canada          | 1011        | 1.7        | 0.7        | 0.0        | 1.3        | 1.6        | 2.0        | 5.0         |
|                                                       | Costa Rica      | 187         | 1.8        | 2.0        | 0.0        | 0.9        | 1.6        | 2.2        | 17.7        |
|                                                       | Panama          | 45          | 1.8        | 0.7        | 0.8        | 1.5        | 1.7        | 2.1        | 4.7         |
|                                                       | Peru            | 87          | 1.2        | 0.5        | 0.1        | 0.9        | 1.3        | 1.5        | 2.4         |
| <b>2. Cakes, biscuits, pastries, and sweet breads</b> | <b>Regional</b> | <b>3524</b> | <b>0.9</b> | <b>0.8</b> | <b>0.0</b> | <b>0.5</b> | <b>0.7</b> | <b>1.3</b> | <b>23.0</b> |
|                                                       | Argentina       | 625         | 0.8        | 0.6        | 0.0        | 0.3        | 0.6        | 1.1        | 4.6         |
|                                                       | Canada          | 2024        | 1.0        | 0.9        | 0.0        | 0.5        | 0.8        | 1.4        | 23.0        |
|                                                       | Costa Rica      | 511         | 0.9        | 0.7        | 0.0        | 0.4        | 0.7        | 1.2        | 3.5         |
|                                                       | Panama          | 99          | 1.0        | 0.9        | 0.1        | 0.5        | 0.8        | 1.3        | 5.0         |
|                                                       | Peru            | 265         | 0.7        | 0.4        | 0.0        | 0.4        | 0.6        | 0.9        | 2.3         |
| <b>3. Corn derivatives</b>                            | <b>Regional</b> | <b>58</b>   | <b>1.3</b> | <b>1.2</b> | <b>0.0</b> | <b>0.5</b> | <b>1.0</b> | <b>2.0</b> | <b>6.3</b>  |
|                                                       | Costa Rica      | 43          | 1.2        | 1.0        | 0.0        | 0.2        | 0.8        | 2.0        | 3.2         |
|                                                       | Panama          | 8           | 2.0        | 2.1        | 0.1        | 0.5        | 1.3        | 2.7        | 6.3         |
|                                                       | Peru            | 7           | 1.1        | 0.4        | 0.9        | 0.9        | 1.0        | 1.0        | 2.1         |
| <b>4. Breakfast cereal</b>                            | <b>Regional</b> | <b>1090</b> | <b>0.8</b> | <b>0.6</b> | <b>0.0</b> | <b>0.3</b> | <b>0.8</b> | <b>1.2</b> | <b>6.8</b>  |
|                                                       | Argentina       | 87          | 0.6        | 0.5        | 0.0        | 0.2        | 0.6        | 0.9        | 2.2         |
|                                                       | Canada          | 617         | 0.9        | 0.6        | 0.0        | 0.3        | 1.0        | 1.3        | 6.8         |
|                                                       | Costa Rica      | 195         | 0.7        | 0.5        | 0.0        | 0.3        | 0.7        | 1.1        | 2.5         |
|                                                       | Panama          | 49          | 0.9        | 0.6        | 0.0        | 0.5        | 0.9        | 1.1        | 3.1         |
|                                                       | Peru            | 142         | 0.5        | 0.5        | 0.0        | 0.0        | 0.5        | 0.9        | 2.1         |
| <b>5. Savoury snacks</b>                              | <b>Regional</b> | <b>1691</b> | <b>1.1</b> | <b>0.8</b> | <b>0.0</b> | <b>0.6</b> | <b>1.0</b> | <b>1.4</b> | <b>6.7</b>  |
|                                                       | Argentina       | 143         | 1.2        | 0.6        | 0.0        | 0.8        | 1.2        | 1.7        | 2.9         |
|                                                       | Canada          | 960         | 1.1        | 0.7        | 0.0        | 0.6        | 1.0        | 1.4        | 6.7         |
|                                                       | Costa Rica      | 336         | 1.0        | 0.9        | 0.0        | 0.4        | 0.8        | 1.4        | 5.4         |

| Category                                      | Country                                            | Product (n)     | Mean        | SD          | Minimum     | q25        | Median     | q75        | Maximum     |
|-----------------------------------------------|----------------------------------------------------|-----------------|-------------|-------------|-------------|------------|------------|------------|-------------|
|                                               | Panama                                             | 93              | 1.2         | 0.9         | 0.0         | 0.7        | 1.0        | 1.6        | 4.4         |
|                                               | Peru                                               | 159             | 0.9         | 0.6         | 0.0         | 0.5        | 0.7        | 1.1        | 3.2         |
| <b>6. Cheese</b>                              | <b>Regional</b>                                    | <b>1807</b>     | <b>2.3</b>  | <b>1.5</b>  | <b>0.0</b>  | <b>1.5</b> | <b>1.9</b> | <b>2.6</b> | <b>25.0</b> |
|                                               | Argentina                                          | 256             | 2.1         | 1.3         | 0.0         | 1.3        | 1.9        | 2.6        | 9.7         |
|                                               | Canada                                             | 1162            | 2.3         | 1.3         | 0.0         | 1.6        | 1.9        | 2.5        | 10.3        |
|                                               | Costa Rica                                         | 214             | 2.4         | 2.4         | 0.0         | 1.5        | 1.9        | 2.7        | 25.0        |
|                                               | Panama                                             | 68              | 3.0         | 1.7         | 0.2         | 1.7        | 2.4        | 4.1        | 7.5         |
|                                               | Peru                                               | 107             | 2.1         | 1.2         | 0.0         | 1.3        | 1.8        | 2.8        | 6.4         |
|                                               | <b>7. Processed vegetables, beans, and legumes</b> | <b>Regional</b> | <b>1933</b> | <b>11.6</b> | <b>20.2</b> | <b>0.0</b> | <b>2.3</b> | <b>5.1</b> | <b>10.6</b> |
| Argentina                                     |                                                    | 148             | 9.4         | 15.0        | 0.0         | 1.3        | 3.9        | 12.4       | 123.1       |
| Canada                                        |                                                    | 1221            | 12.7        | 22.1        | 0.0         | 2.2        | 4.9        | 10.7       | 192.0       |
| Costa Rica                                    |                                                    | 376             | 8.6         | 11.8        | 0.0         | 3.2        | 5.3        | 9.3        | 114.3       |
| Panama                                        |                                                    | 110             | 11.7        | 27.5        | 0.0         | 3.2        | 5.8        | 9.0        | 186.7       |
| Peru                                          |                                                    | 78              | 12.1        | 14.4        | 0.1         | 3.0        | 6.3        | 17.4       | 84.6        |
| <b>8. Processed meat and poultry</b>          | <b>Regional</b>                                    | <b>1772</b>     | <b>4.3</b>  | <b>2.8</b>  | <b>0.0</b>  | <b>2.4</b> | <b>3.6</b> | <b>5.6</b> | <b>23.7</b> |
|                                               | Argentina                                          | 178             | 4.6         | 3.7         | 0.3         | 2.2        | 3.4        | 5.5        | 23.7        |
|                                               | Canada                                             | 1204            | 4.2         | 2.4         | 0.0         | 2.3        | 3.6        | 5.5        | 12.4        |
|                                               | Costa Rica                                         | 184             | 5.3         | 3.8         | 0.0         | 3.1        | 4.2        | 7.0        | 23.4        |
|                                               | Panama                                             | 93              | 4.5         | 2.6         | 0.4         | 2.9        | 4.2        | 5.8        | 12.6        |
|                                               | Peru                                               | 113             | 4.0         | 2.8         | 0.8         | 2.0        | 3.3        | 4.6        | 14.6        |
| <b>9. Processed fish and seafood</b>          | <b>Regional</b>                                    | <b>945</b>      | <b>3.5</b>  | <b>7.1</b>  | <b>0.0</b>  | <b>1.4</b> | <b>2.2</b> | <b>3.5</b> | <b>76.5</b> |
|                                               | Argentina                                          | 54              | 3.5         | 6.4         | 0.0         | 1.3        | 2.2        | 3.0        | 40.3        |
|                                               | Canada                                             | 579             | 4.0         | 8.6         | 0.0         | 1.5        | 2.4        | 3.6        | 76.5        |
|                                               | Costa Rica                                         | 175             | 2.7         | 3.5         | 0.1         | 1.2        | 1.9        | 3.1        | 31.7        |
|                                               | Panama                                             | 71              | 2.9         | 1.9         | 0.5         | 1.4        | 2.4        | 3.9        | 12.3        |
|                                               | Peru                                               | 66              | 2.5         | 1.8         | 0.2         | 1.4        | 2.0        | 3.2        | 9.1         |
| <b>10. Soy products and meat alternatives</b> | <b>Regional</b>                                    | <b>272</b>      | <b>2.7</b>  | <b>1.5</b>  | <b>0.0</b>  | <b>1.8</b> | <b>2.5</b> | <b>3.4</b> | <b>8.2</b>  |
|                                               | Argentina                                          | 77              | 2.2         | 1.1         | 0.0         | 1.3        | 2.1        | 2.5        | 6.5         |

| Category                                                         | Country         | Product (n) | Mean        | SD          | Minimum    | q25        | Median     | q75         | Maximum      |
|------------------------------------------------------------------|-----------------|-------------|-------------|-------------|------------|------------|------------|-------------|--------------|
|                                                                  | Canada          | 115         | 3.2         | 1.4         | 0.0        | 2.3        | 3.0        | 4.0         | 7.0          |
|                                                                  | Costa Rica      | 49          | 3.1         | 1.8         | 0.1        | 2.3        | 2.7        | 3.7         | 8.2          |
|                                                                  | Panama          | 5           | 1.4         | 2.3         | 0.1        | 0.1        | 0.1        | 1.3         | 5.5          |
|                                                                  | Peru            | 26          | 1.9         | 0.9         | 0.1        | 1.6        | 2.4        | 2.6         | 2.8          |
| <b>11. Soups</b>                                                 | <b>Regional</b> | <b>700</b>  | <b>11.7</b> | <b>17.8</b> | <b>0.0</b> | <b>3.9</b> | <b>6.0</b> | <b>11.1</b> | <b>180.0</b> |
|                                                                  | Argentina       | 45          | 10.5        | 8.0         | 2.2        | 3.7        | 9.9        | 12.1        | 40.7         |
|                                                                  | Canada          | 472         | 12.5        | 20.4        | 0.0        | 3.8        | 6.0        | 8.6         | 180.0        |
|                                                                  | Costa Rica      | 83          | 12.9        | 13.6        | 0.0        | 4.9        | 8.7        | 14.8        | 66.2         |
|                                                                  | Panama          | 48          | 10.7        | 6.8         | 2.0        | 4.4        | 10.8       | 16.2        | 26.5         |
|                                                                  | Peru            | 52          | 5.5         | 3.7         | 0.9        | 3.2        | 4.5        | 6.2         | 17.6         |
| <b>12. Ready-made foods, convenience foods, and mixed dishes</b> | <b>Regional</b> | <b>2116</b> | <b>2.3</b>  | <b>1.2</b>  | <b>0.0</b> | <b>1.6</b> | <b>2.1</b> | <b>2.7</b>  | <b>21.8</b>  |
|                                                                  | Argentina       | 144         | 2.0         | 0.8         | 0.2        | 1.4        | 2.1        | 2.5         | 4.8          |
|                                                                  | Canada          | 1769        | 2.2         | 1.1         | 0.0        | 1.6        | 2.1        | 2.6         | 21.8         |
|                                                                  | Costa Rica      | 115         | 2.3         | 1.4         | 0.0        | 1.3        | 2.1        | 3.0         | 6.7          |
|                                                                  | Panama          | 24          | 2.6         | 3.2         | 0.0        | 2.0        | 2.2        | 2.5         | 16.9         |
|                                                                  | Peru            | 64          | 3.2         | 2.2         | 0.3        | 1.9        | 2.7        | 3.7         | 14.1         |
| <b>13. Fresh or dried plain pasta and noodles</b>                | <b>Regional</b> | <b>1110</b> | <b>0.1</b>  | <b>0.3</b>  | <b>0.0</b> | <b>0.0</b> | <b>0.0</b> | <b>0.0</b>  | <b>5.1</b>   |
|                                                                  | Argentina       | 201         | 0.0         | 0.1         | 0.0        | 0.0        | 0.0        | 0.0         | 0.8          |
|                                                                  | Canada          | 571         | 0.1         | 0.3         | 0.0        | 0.0        | 0.0        | 0.0         | 5.1          |
|                                                                  | Costa Rica      | 128         | 0.1         | 0.6         | 0.0        | 0.0        | 0.0        | 0.0         | 5.1          |
|                                                                  | Panama          | 39          | 0.1         | 0.2         | 0.0        | 0.0        | 0.0        | 0.0         | 0.7          |
|                                                                  | Peru            | 171         | 0.0         | 0.2         | 0.0        | 0.0        | 0.0        | 0.0         | 2.1          |
| <b>14. Granola and energy bars and nut butters/spreads</b>       | <b>Regional</b> | <b>967</b>  | <b>0.5</b>  | <b>0.4</b>  | <b>0.0</b> | <b>0.3</b> | <b>0.5</b> | <b>0.8</b>  | <b>4.1</b>   |
|                                                                  | Argentina       | 33          | 0.3         | 0.3         | 0.0        | 0.1        | 0.3        | 0.5         | 0.9          |
|                                                                  | Canada          | 736         | 0.6         | 0.3         | 0.0        | 0.3        | 0.6        | 0.8         | 3.0          |
|                                                                  | Costa Rica      | 117         | 0.5         | 0.6         | 0.0        | 0.1        | 0.4        | 0.7         | 4.1          |
|                                                                  | Panama          | 32          | 0.6         | 0.2         | 0.1        | 0.4        | 0.6        | 0.8         | 0.9          |
|                                                                  | Peru            | 49          | 0.3         | 0.3         | 0.0        | 0.1        | 0.2        | 0.5         | 1.1          |

| Category                                      | Country         | Product (n)  | Mean        | SD          | Minimum    | q25        | Median     | q75         | Maximum      |
|-----------------------------------------------|-----------------|--------------|-------------|-------------|------------|------------|------------|-------------|--------------|
| <b>15. Fats and oils</b>                      | <b>Regional</b> | <b>1035</b>  | <b>2.6</b>  | <b>3.9</b>  | <b>0.0</b> | <b>1.0</b> | <b>1.8</b> | <b>3.1</b>  | <b>44.0</b>  |
|                                               | Argentina       | 85           | 2.0         | 2.0         | 0.0        | 0.5        | 1.6        | 3.0         | 10.5         |
|                                               | Canada          | 691          | 2.6         | 3.7         | 0.0        | 1.0        | 1.8        | 3.1         | 36.0         |
|                                               | Costa Rica      | 140          | 3.4         | 5.7         | 0.0        | 1.1        | 2.0        | 3.3         | 44.0         |
|                                               | Panama          | 45           | 2.9         | 4.3         | 0.6        | 1.2        | 2.0        | 3.3         | 28.0         |
|                                               | Peru            | 74           | 2.7         | 3.3         | 0.0        | 1.0        | 1.6        | 2.7         | 22.7         |
| <b>16. Sauces, dips, gravy and condiments</b> | <b>Regional</b> | <b>2660</b>  | <b>22.0</b> | <b>41.4</b> | <b>0.0</b> | <b>3.7</b> | <b>7.8</b> | <b>19.0</b> | <b>653.2</b> |
|                                               | Argentina       | 190          | 28.8        | 52.2        | 0.0        | 3.0        | 8.5        | 36.0        | 455.0        |
|                                               | Canada          | 1819         | 18.3        | 30.2        | 0.0        | 3.8        | 7.7        | 18.0        | 334.7        |
|                                               | Costa Rica      | 291          | 23.6        | 42.9        | 0.0        | 2.9        | 8.0        | 22.2        | 335.0        |
|                                               | Panama          | 153          | 45.9        | 70.1        | 0.0        | 5.5        | 14.2       | 50.0        | 352.5        |
|                                               | Peru            | 207          | 28.0        | 68.8        | 0.0        | 2.6        | 6.3        | 16.2        | 653.2        |
| <b>Total</b>                                  | <b>Regional</b> | <b>23219</b> | <b>5.2</b>  | <b>17.0</b> | <b>0.0</b> | <b>0.8</b> | <b>1.7</b> | <b>3.5</b>  | <b>653.2</b> |
|                                               | Argentina       | 2492         | 4.3         | 16.7        | 0.0        | 0.5        | 1.4        | 2.5         | 455.0        |
|                                               | Canada          | 14951        | 5.1         | 14.3        | 0.0        | 0.9        | 1.8        | 3.6         | 334.7        |
|                                               | Costa Rica      | 3135         | 4.9         | 15.5        | 0.0        | 0.6        | 1.6        | 3.6         | 335.0        |
|                                               | Panama          | 974          | 10.5        | 33.2        | 0.0        | 0.9        | 2.3        | 5.5         | 352.5        |
|                                               | Peru            | 1667         | 5.3         | 26.0        | 0.0        | 0.5        | 1.1        | 2.8         | 653.2        |



331 **Table 3.** Proportion of products meeting the 2022 PAHO Sodium Interim Targets (mg per 100g/mL), at the regional and country  
 332 level, by food category

| PAHO 2021<br>Major and<br>Subcategory                | Regional |               | Argentina |               | Costa Rica |               | Panama |               | Peru |               | Canada |               |
|------------------------------------------------------|----------|---------------|-----------|---------------|------------|---------------|--------|---------------|------|---------------|--------|---------------|
|                                                      | n        | % (n)<br>2022 | n         | % (n)<br>2022 | n          | % (n)<br>2022 | n      | % (n)<br>2022 | n    | % (n)<br>2022 | n      | % (n)<br>2022 |
| <b>1. Bread, bread products and crisp breads</b>     | 1564     | 30 (476)      | 226       | 27 (60)       | 188        | 36 (68)       | 44     | 20 (9)        | 87   | 55 (48)       | 1019   | 29 (291)      |
| <b>2. Cakes, biscuits, pastries and sweet breads</b> | 3530     | 43 (1526)     | 626       | 56 (351)      | 512        | 42 (217)      | 99     | 34 (34)       | 265  | 51 (134)      | 2028   | 39 (790)      |
| <b>3. Corn derivatives</b>                           | 58       | 47 (27)       | 0         | NA            | 43         | 44 (19)       | 8      | 25 (2)        | 7    | 86 (6)        | 0      | NA            |
| <b>4. Breakfast cereal</b>                           | 1089     | 46 (499)      | 87        | 56 (49)       | 195        | 49 (96)       | 48     | 38 (18)       | 142  | 56 (79)       | 617    | 42 (257)      |
| <b>5. Savoury snacks</b>                             | 1692     | 45 (754)      | 143       | 23 (33)       | 336        | 52 (174)      | 92     | 36 (33)       | 159  | 62 (99)       | 962    | 43 (415)      |
| <b>6. Cheese</b>                                     | 1813     | 50 (909)      | 256       | 69 (176)      | 214        | 57 (121)      | 68     | 44 (30)       | 108  | 60 (65)       | 1167   | 44 (517)      |
| <b>7. Processed vegetables, beans, and legumes</b>   | 1976     | 43 (852)      | 151       | 41 (62)       | 394        | 45 (178)      | 109    | 28 (30)       | 78   | 54 (42)       | 1244   | 43 (540)      |
| <b>8. Processed meat and poultry</b>                 | 1776     | 53 (948)      | 178       | 42 (75)       | 184        | 31 (57)       | 91     | 47 (43)       | 113  | 65 (74)       | 1210   | 58 (699)      |
| <b>9. Processed fish and seafood</b>                 | 946      | 41 (385)      | 54        | 54 (29)       | 175        | 42 (73)       | 72     | 36 (26)       | 66   | 33 (22)       | 579    | 41 (235)      |
| <b>10. Soy products and meat alternatives</b>        | 274      | 46 (127)      | 77        | 69 (53)       | 50         | 28 (14)       | 5      | 80 (4)        | 26   | 85 (22)       | 116    | 29 (34)       |
| <b>11. Soups</b>                                     | 715      | 48 (346)      | 45        | 53 (24)       | 83         | 40 (33)       | 48     | 40 (19)       | 54   | 15 (8)        | 485    | 54 (262)      |
| <b>12. Ready-made foods,</b>                         | 2133     | 77 (1638)     | 144       | 81 (116)      | 116        | 68 (79)       | 24     | 67 (16)       | 65   | 82 (53)       | 1784   | 77 (1374)     |

|                                                            |      |           |     |          |     |          |     |         |     |         |      |          |
|------------------------------------------------------------|------|-----------|-----|----------|-----|----------|-----|---------|-----|---------|------|----------|
| <b>convenience foods, and mixed dishes</b>                 |      |           |     |          |     |          |     |         |     |         |      |          |
| <b>13. Fresh or dried plain pasta and noodles</b>          | 1108 | 43 (479)  | 202 | 16 (33)  | 125 | 57 (71)  | 39  | 41 (16) | 171 | 41 (70) | 571  | 51 (289) |
| <b>14. Granola and energy bars and nut butters/spreads</b> | 967  | 37 (357)  | 33  | 67 (22)  | 117 | 50 (58)  | 31  | 35 (11) | 50  | 68 (34) | 736  | 32 (232) |
| <b>15. Fats and oils</b>                                   | 1044 | 40 (414)  | 86  | 57 (49)  | 144 | 50 (72)  | 48  | 19 (9)  | 74  | 47 (35) | 692  | 36 (249) |
| <b>16. Sauces, dips, gravy and condiments</b>              | 2978 | 44 (1300) | 203 | 57 (116) | 341 | 39 (132) | 153 | 34 (52) | 223 | 40 (89) | 2058 | 44 (911) |

333 Note: n, number of foods sampled and % (n) of products meeting the 2022 PAHO interim targets (items were compared against the targets set for  
 334 respective sub categories). NA, not applicable.

335 **Table 4.** Proportion of products meeting the 2022 PAHO Sodium Targets (mg/kcal), at the regional and country level, by food  
336 category

| PAHO 2021<br>Major and<br>Subcategory                | Regional |               | Argentina |               | Costa Rica |               | Panama |               | Peru |               | Canada |               |
|------------------------------------------------------|----------|---------------|-----------|---------------|------------|---------------|--------|---------------|------|---------------|--------|---------------|
|                                                      | n        | % (n)<br>2022 | n         | % (n)<br>2022 | n          | % (n)<br>2022 | n      | % (n)<br>2022 | n    | % (n)<br>2022 | n      | % (n)<br>2022 |
| <b>1. Bread, bread products and crisp breads</b>     | 1556     | 31 (487)      | 226       | 27 (62)       | 187        | 40 (74)       | 45     | 24 (11)       | 87   | 55 (48)       | 1011   | 29 (292)      |
| <b>2. Cakes, biscuits, pastries and sweet breads</b> | 3524     | 43 (1526)     | 625       | 52 (326)      | 511        | 41 (212)      | 99     | 38 (38)       | 265  | 52 (139)      | 2024   | 40 (811)      |
| <b>3. Corn derivatives</b>                           | 58       | 67 (39)       | NA        | NA            | 43         | 65 (28)       | 8      | 62 (5)        | 7    | 86 (6)        | NA     | NA            |
| <b>4. Breakfast cereal</b>                           | 1090     | 40 (441)      | 87        | 48 (42)       | 195        | 43 (84)       | 49     | 33 (16)       | 142  | 55 (78)       | 617    | 36 (221)      |
| <b>5. Savoury snacks</b>                             | 1691     | 71 (1205)     | 143       | 57 (82)       | 336        | 74 (248)      | 93     | 66 (61)       | 159  | 84 (134)      | 960    | 71 (680)      |
| <b>6. Cheese</b>                                     | 1807     | 35 (639)      | 256       | 36 (92)       | 214        | 43 (93)       | 68     | 43 (29)       | 107  | 41 (44)       | 1162   | 33 (381)      |
| <b>7. Processed vegetables, beans, and legumes</b>   | 1706     | 47 (795)      | 128       | 47 (60)       | 354        | 45 (161)      | 95     | 33 (31)       | 72   | 49 (35)       | 1057   | 48 (508)      |
| <b>8. Processed meat and poultry</b>                 | 1772     | 39 (689)      | 178       | 33 (59)       | 184        | 30 (55)       | 93     | 28 (26)       | 113  | 38 (43)       | 1204   | 42 (506)      |
| <b>9. Processed fish and seafood</b>                 | 945      | 48 (453)      | 54        | 52 (28)       | 175        | 57 (100)      | 71     | 41 (29)       | 66   | 56 (37)       | 579    | 45 (259)      |
| <b>10. Soy products and meat alternatives</b>        | 272      | 49 (133)      | 77        | 73 (56)       | 49         | 37 (18)       | 5      | 80 (4)        | 26   | 65 (17)       | 115    | 33 (38)       |
| <b>11. Soups</b>                                     | 700      | 67 (472)      | 45        | 40 (18)       | 83         | 48 (40)       | 48     | 44 (21)       | 52   | 67 (35)       | 472    | 76 (358)      |
| <b>12. Ready-made foods,</b>                         | 2107     | 35 (735)      | 144       | 48 (69)       | 115        | 47 (54)       | 24     | 25 (6)        | 64   | 23 (15)       | 1760   | 34 (591)      |

|                                                            |      |           |     |          |     |          |     |         |     |          |      |          |
|------------------------------------------------------------|------|-----------|-----|----------|-----|----------|-----|---------|-----|----------|------|----------|
| <b>convenience foods, and mixed dishes</b>                 |      |           |     |          |     |          |     |         |     |          |      |          |
| <b>13. Fresh or dried plain pasta and noodles</b>          | 1110 | 43 (479)  | 201 | 16 (33)  | 128 | 55 (71)  | 39  | 41 (16) | 171 | 41 (70)  | 571  | 51 (289) |
| <b>14. Granola and energy bars and nut butters/spreads</b> | 967  | 47 (455)  | 33  | 76 (25)  | 117 | 63 (74)  | 32  | 38 (12) | 49  | 69 (34)  | 736  | 42 (310) |
| <b>15. Fats and oils</b>                                   | 1035 | 43 (448)  | 85  | 52 (44)  | 140 | 41 (57)  | 45  | 29 (13) | 74  | 39 (29)  | 691  | 44 (305) |
| <b>16. Sauces, dips, gravy and condiments</b>              | 2660 | 49 (1308) | 190 | 53 (101) | 291 | 40 (116) | 153 | 27 (42) | 207 | 48 (100) | 1818 | 52 (948) |

337 Note: n, number of foods sampled and % (n) of products meeting the 2022 PAHO interim targets (items were compared against the targets set for  
 338 respective sub categories). NA, not applicable.

339 **Table 5.** Changes in the proportion of packaged food products meeting the original 2015 PAHO regional sodium reduction targets  
 340 (2015 PAHO Targets, mg/100g) in PAHO countries between 2015-2016, 2017-2018 and in 2022, by main food category

| PAHO categories                            | Year of collection | Products with sodium data (n) | Meeting 2015 Regional Targets (n) | Proportion (%) | Meeting 2015 Lower Targets (n) | Proportion (%) |
|--------------------------------------------|--------------------|-------------------------------|-----------------------------------|----------------|--------------------------------|----------------|
| <b>Bread products</b>                      | 2015-2016          | 274                           | 206                               | 75             | 89                             | 32             |
|                                            | 2017-2018          | 218                           | 201                               | 92             | 99                             | 45             |
|                                            | 2022               | 356                           | 296                               | 83             | 142                            | 40             |
| <b>Breakfast cereals</b>                   | 2015-2016          | 294                           | 257                               | 87             | 222                            | 76             |
|                                            | 2017-2018          | 299                           | 268                               | 90             | 237                            | 79             |
|                                            | 2022               | 472                           | 452                               | 96             | 379                            | 80             |
| <b>Butter and margarine</b>                | 2015-2016          | 84                            | 68                                | 81             | 43                             | 51             |
|                                            | 2017-2018          | 100                           | 82                                | 82             | 45                             | 45             |
|                                            | 2022               | 107                           | 76                                | 71             | 34                             | 32             |
| <b>Cakes</b>                               | 2015-2016          | 204                           | 142                               | 70             | 72                             | 35             |
|                                            | 2017-2018          | 102                           | 71                                | 70             | 32                             | 31             |
|                                            | 2022               | 358                           | 250                               | 70             | 96                             | 27             |
| <b>Bouillon cubes and powders</b>          | 2015-2016          | 73                            | 38                                | 52             | 22                             | 30             |
|                                            | 2017-2018          | 51                            | 25                                | 49             | 11                             | 22             |
|                                            | 2022               | 46                            | 36                                | 78             | 34                             | 74             |
| <b>Meat and fish seasonings</b>            | 2015-2016          | 52                            | 49                                | 94             | 49                             | 94             |
|                                            | 2017-2018          | 64                            | 58                                | 91             | 58                             | 91             |
|                                            | 2022               | 121                           | 105                               | 87             | 88                             | 73             |
| <b>Seasonings for side and main dishes</b> | 2015-2016          | 117                           | 117                               | 100            | 86                             | 74             |
|                                            | 2017-2018          | 34                            | 34                                | 100            | 23                             | 68             |
|                                            | 2022               | 43                            | 42                                | 98             | 8                              | 19             |
| <b>Cookies and sweet cookies</b>           | 2015-2016          | 316                           | 294                               | 93             | 156                            | 49             |
|                                            | 2017-2018          | 549                           | 527                               | 96             | 304                            | 55             |
|                                            | 2022               | 857                           | 826                               | 96             | 499                            | 58             |
| <b>Flavored cookies and crackers</b>       | 2015-2016          | 148                           | 141                               | 95             | 79                             | 53             |
|                                            | 2017-2018          | 158                           | 157                               | 99             | 103                            | 65             |
|                                            | 2022               | 273                           | 271                               | 99             | 163                            | 60             |
| <b>Mayonnaise</b>                          | 2015-2016          | 72                            | 69                                | 96             | 20                             | 28             |
|                                            | 2017-2018          | 80                            | 72                                | 90             | 16                             | 20             |
|                                            | 2022               | 96                            | 89                                | 93             | 37                             | 39             |
| <b>Meats and sausages</b>                  | 2015-2016          | 269                           | 227                               | 84             | 67                             | 25             |

| PAHO categories                        | Year of collection | Products with sodium data (n) | Meeting 2015 Regional Targets (n) | Proportion (%) | Meeting 2015 Lower Targets (n) | Proportion (%) |
|----------------------------------------|--------------------|-------------------------------|-----------------------------------|----------------|--------------------------------|----------------|
|                                        | 2017-2018          | 321                           | 260                               | 81             | 65                             | 20             |
|                                        | 2022               | 297                           | 272                               | 92             | 73                             | 25             |
| <b>Cured and preserved meats</b>       | 2015-2016          | 29                            | 21                                | 72             | 11                             | 38             |
|                                        | 2017-2018          | 62                            | 52                                | 84             | 24                             | 39             |
|                                        | 2022               | 160                           | 131                               | 82             | 60                             | 38             |
| <b>Breaded meat and poultry</b>        | 2015-2016          | 64                            | 40                                | 63             | 10                             | 16             |
|                                        | 2017-2018          | 68                            | 56                                | 82             | 38                             | 56             |
|                                        | 2022               | 109                           | 98                                | 90             | 45                             | 41             |
| <b>Pasta and noodles, as consumed</b>  | 2015-2016          | N/A                           | N/A                               | N/A            | N/A                            | N/A            |
|                                        | 2017-2018          | 136                           | 104                               | 76             | 42                             | 31             |
|                                        | 2022               | 111                           | 101                               | 91             | 69                             | 62             |
| <b>Pasta and noodles, dry uncooked</b> | 2015-2016          | 217                           | 213                               | 98             | 206                            | 95             |
|                                        | 2017-2018          | 319                           | 318                               | 100            | 318                            | 100            |
|                                        | 2022               | 573                           | 572                               | 100            | 530                            | 92             |
| <b>Snacks</b>                          | 2015-2016          | 445                           | 344                               | 77             | 177                            | 40             |
|                                        | 2017-2018          | 512                           | 434                               | 85             | 214                            | 42             |
|                                        | 2022               | 730                           | 644                               | 88             | 358                            | 49             |
| <b>Noodles in broth</b>                | 2015-2016          | 68                            | 58                                | 85             | 35                             | 51             |
|                                        | 2017-2018          | 42                            | 28                                | 67             | 15                             | 36             |
|                                        | 2022               | 99                            | 64                                | 65             | 36                             | 36             |
| <b>Wet and dry soups</b>               | 2015-2016          | 189                           | 114                               | 60             | 68                             | 36             |
|                                        | 2017-2018          | 126                           | 98                                | 78             | 71                             | 56             |
|                                        | 2022               | 132                           | 113                               | 86             | 61                             | 46             |
| <b>Total</b>                           | 2015-2016          | 2915                          | 2398                              | 82             | 1412                           | 48             |
|                                        | 2017-2018          | 3241                          | 2845                              | 88             | 1715                           | 53             |
|                                        | 2022               | 4940                          | 4438                              | 90             | 2712                           | 55             |

341 Note: NA, not applicable.

Monitoring sodium content in packaged foods sold in the Americas and compliance with the PAHO 2021 regional sodium targets

## 342 **References**

- 343 1. World Health Organization. *WHO Global Report on Sodium Intake Reduction*. Geneva:  
344 *World Health Organization*; 2023. World Health Organization; 2023.  
345 <https://www.who.int/publications/i/item/9789240069985>
- 346 2. Kearney PM, Whelton M, Reynolds K, Muntner P, Whelton PK, He J. Global burden of  
347 hypertension: analysis of worldwide data. *The Lancet*. 2005;365(9455):217-223.  
348 doi:10.1016/S0140-6736(05)17741-1
- 349 3. Zhou B, Carrillo-Larco RM, Danaei G, et al. Worldwide trends in hypertension prevalence  
350 and progress in treatment and control from 1990 to 2019: a pooled analysis of 1201  
351 population-representative studies with 104 million participants. *The Lancet*.  
352 2021;398(10304):957-980. doi:10.1016/S0140-6736(21)01330-1
- 353 4. Grillo A, Salvi L, Coruzzi P, Salvi P, Parati G. Sodium Intake and Hypertension. *Nutrients*.  
354 2019;11(9):1970. doi:10.3390/nu11091970
- 355 5. World Health Organization. *Guideline: Sodium Intake for Adults and Children*. World  
356 Health Organization; 2012. Accessed July 23, 2023.  
357 <https://apps.who.int/iris/handle/10665/77985>
- 358 6. World Health Organization. *Global Action Plan for the Prevention and Control of*  
359 *Noncommunicable Diseases 2013-2020*. World Health Organization; 2013. Accessed July  
360 23, 2023. <https://apps.who.int/iris/handle/10665/94384>
- 361 7. World Health Organization. *Tackling NCDs: “best Buys” and Other Recommended*  
362 *Interventions for the Prevention and Control of Noncommunicable Diseases.*; 2017.  
363 Accessed August 1, 2023. <https://apps.who.int/iris/handle/10665/259232>
- 364 8. Pan American Health Organization. Salt smart Consortium Consensus Statement. Published  
365 December 28, 2015. Accessed August 2, 2023.  
366 <https://www.paho.org/en/documents/saltsmart-consortium-consensus-statement>
- 367 9. Arcand J, Blanco-Metzler A, Benavides Aguilar K, L’Abbe M, Legetic B. Sodium Levels in  
368 Packaged Foods Sold in 14 Latin American and Caribbean Countries: A Food Label  
369 Analysis. *Nutrients*. 2019;11(2):369. doi:10.3390/nu11020369
- 370 10. Blanco-Metzler A, Vega-Solano J, Franco-Arellano B, et al. Changes in the Sodium Content  
371 of Foods Sold in Four Latin American Countries: 2015 to 2018. *Nutrients*.  
372 2021;13(11):4108. doi:10.3390/nu13114108
- 373 11. Allemandi LA, Flexner N, Nederveen L, Gomes FDS. Building capacity in reducing  
374 population dietary sodium intake in the Americas. *Rev Panam Salud Pública*. 2022;46:1.  
375 doi:10.26633/RPSP.2022.198
- 376 12. Pan American Health Organization. Updated PAHO Regional Sodium Reduction Targets.  
377 Published 2021. Accessed August 2, 2023.

- 378 [https://iris.paho.org/bitstream/handle/10665.2/54658/PAHONMHRF210016\\_eng.pdf?sequen](https://iris.paho.org/bitstream/handle/10665.2/54658/PAHONMHRF210016_eng.pdf?sequence=1&isAllowed=y)  
379 [ce=1&isAllowed=y](https://iris.paho.org/bitstream/handle/10665.2/54658/PAHONMHRF210016_eng.pdf?sequence=1&isAllowed=y)
- 380 13. World Health Organization. WHO global sodium benchmarks for different food categories.  
381 Published May 3, 2021. Accessed August 2, 2023.  
382 <https://www.who.int/publications/i/item/9789240025097>
- 383 14. Ahmed M, Schermel A, Lee J, Weippert M, Franco-Arellano B, L'Abbé M. Development of  
384 the Food Label Information Program: A Comprehensive Canadian Branded Food  
385 Composition Database. *Front Nutr*. 2022;8:825050. doi:10.3389/fnut.2021.825050
- 386 15. World Health Organization. SHAKE the salt habit: Technical package for salt reduction.  
387 Published 2017. Accessed August 2, 2023. [https://www.who.int/publications/i/item/WHO-](https://www.who.int/publications/i/item/WHO-NMH-PND-16.4)  
388 [NMH-PND-16.4](https://www.who.int/publications/i/item/WHO-NMH-PND-16.4)
- 389 16. Murtaugh MA, Beasley JM, Appel LJ, et al. Relationship of Sodium Intake and Blood  
390 Pressure Varies With Energy Intake: Secondary Analysis of the DASH (Dietary Approaches  
391 to Stop Hypertension)–Sodium Trial. *Hypertension*. 2018;71(5):858-865.  
392 doi:10.1161/HYPERTENSIONAHA.117.10602
- 393 17. Allemandi L, Tiscornia MV, Ponce M, Castronuovo L, Dunford E, Schoj V. Sodium content  
394 in processed foods in Argentina: compliance with the national law. *Cardiovasc Diagn Ther*.  
395 2015;5(3):197-206. doi:10.3978/j.issn.2223-3652.2015.04.01
- 396 18. Allemandi L, Tiscornia MV, Guarnieri L, Castronuovo L, Martins E. Monitoring Sodium  
397 Content in Processed Foods in Argentina 2017–2018: Compliance with National Legislation  
398 and Regional Targets. *Nutrients*. 2019;11(7):1474. doi:10.3390/nu11071474
- 399 19. Guarnieri L, Castronuovo L, Flexner N, Yang Y, L'Abbé MR, Tiscornia V. Monitoring  
400 Sodium Content in Processed and Ultraprocessed Foods in Argentina 2022: Compliance with  
401 National Legislation and Regional Targets. *Public Health Nutr*. Published online 2023.
- 402 20. Elorriaga N, Gutierrez L, Romero I, et al. Collecting Evidence to Inform Salt Reduction  
403 Policies in Argentina: Identifying Sources of Sodium Intake in Adults from a Population-  
404 Based Sample. *Nutrients*. 2017;9(9):964. doi:10.3390/nu9090964
- 405 21. Vega-Solano J, Blanco-Metzler A, Benavides-Aguilar KF, Arcand J. An Evaluation of the  
406 Sodium Content and Compliance with the National Sodium Reduction Targets among  
407 Packaged Foods Sold in Costa Rica in 2015 and 2018. *Nutrients*. 2019;11(9):2226.  
408 doi:10.3390/nu11092226
- 409 22. Blanco-Metzler A, Montero-Campos MDLÁ, Núñez-Rivas H, Gamboa-Cerda C, Sánchez G.  
410 Avances en la reducción del consumo de sal y sodio en Costa Rica. *Rev Panam Salud*  
411 *Pública*. 2012;32(4):316-320. doi:10.1590/S1020-49892012001000011
- 412 23. Roselló-Araya M, Madriz-Morales K, Vega-Solano J, et al. Estimation of Sodium  
413 Availability and Food Sources from 2018 to 2019 and Its Trends during the 2004–2019  
414 Period in Costa Rica. *Nutrients*. 2022;14(15):3200. doi:10.3390/nu14153200



- 415 24. Diez-Canseco F, Cavero V, Alvarez Cano J, et al. Design and approval of the nutritional  
416 warnings' policy in Peru: Milestones, key stakeholders, and policy drivers for its approval.  
417 Shivashankar R, ed. *PLOS Glob Public Health*. 2023;3(6):e0001121.  
418 doi:10.1371/journal.pgph.0001121
- 419 25. Reyes M, Smith Taillie L, Popkin B, Kanter R, Vandevijvere S, Corvalán C. Changes in the  
420 amount of nutrient of packaged foods and beverages after the initial implementation of the  
421 Chilean Law of Food Labelling and Advertising: A nonexperimental prospective study.  
422 Wareham NJ, ed. *PLOS Med*. 2020;17(7):e1003220. doi:10.1371/journal.pmed.1003220
- 423 26. Saavedra-Garcia L, Meza-Hernández M, Diez-Canseco F, Taillie LS. Reformulation of Top-  
424 Selling Processed and Ultra-Processed Foods and Beverages in the Peruvian Food Supply  
425 after Front-of-Package Warning Label Policy. *Int J Environ Res Public Health*.  
426 2022;20(1):424. doi:10.3390/ijerph20010424
- 427 27. Health Canada. Guidance for the Food Industry on Reducing Sodium in Processed Foods  
428 2012. Published 2012. Accessed September 28, 2023.  
429 [https://www.canada.ca/content/dam/hc-sc/migration/hc-sc/fn-](https://www.canada.ca/content/dam/hc-sc/migration/hc-sc/fn-an/alt_formats/pdf/legislation/guide-ld/2012-sodium-reduction-indust-eng.pdf)  
430 [an/alt\\_formats/pdf/legislation/guide-ld/2012-sodium-reduction-indust-eng.pdf](https://www.canada.ca/content/dam/hc-sc/migration/hc-sc/fn-an/alt_formats/pdf/legislation/guide-ld/2012-sodium-reduction-indust-eng.pdf)
- 431 28. Health Canada. Voluntary sodium reduction targets for processed foods 2020–2025.  
432 Published 2020. Accessed September 28, 2023. [https://www.canada.ca/en/health-](https://www.canada.ca/en/health-canada/services/food-nutrition/healthy-eating/sodium/sodium-reduced-targets-2020-2025.html)  
433 [canada/services/food-nutrition/healthy-eating/sodium/sodium-reduced-targets-2020-](https://www.canada.ca/en/health-canada/services/food-nutrition/healthy-eating/sodium/sodium-reduced-targets-2020-2025.html)  
434 [2025.html](https://www.canada.ca/en/health-canada/services/food-nutrition/healthy-eating/sodium/sodium-reduced-targets-2020-2025.html)
- 435 29. Health Canada. Sodium Reduction in Processed Foods in Canada: An evaluation of Progress  
436 toward Voluntary Targets from 2012 to 2016. Published January 2018. Accessed September  
437 30, 2023. [https://www.canada.ca/content/dam/hc-sc/documents/services/food-](https://www.canada.ca/content/dam/hc-sc/documents/services/food-nutrition/legislation-guidelines/guidance-documents/guidance-food-industry-reducing-sodium-processed-foods-progress-report-2017/pub1-eng.pdf)  
438 [nutrition/legislation-guidelines/guidance-documents/guidance-food-industry-reducing-](https://www.canada.ca/content/dam/hc-sc/documents/services/food-nutrition/legislation-guidelines/guidance-documents/guidance-food-industry-reducing-sodium-processed-foods-progress-report-2017/pub1-eng.pdf)  
439 [sodium-processed-foods-progress-report-2017/pub1-eng.pdf](https://www.canada.ca/content/dam/hc-sc/documents/services/food-nutrition/legislation-guidelines/guidance-documents/guidance-food-industry-reducing-sodium-processed-foods-progress-report-2017/pub1-eng.pdf)
- 440 30. Pan American Health Organization. Panamá lanza el Plan de Acción para la Reducción de  
441 Sodio y Eliminación de Grasas Trans (2022-2025). Published 2022. Accessed September 30,  
442 2023. [https://www.paho.org/es/noticias/13-12-2022-panama-lanza-plan-accion-para-](https://www.paho.org/es/noticias/13-12-2022-panama-lanza-plan-accion-para-reduccion-sodio-eliminacion-grasas-trans-2022)  
443 [reduccion-sodio-eliminacion-grasas-trans-2022](https://www.paho.org/es/noticias/13-12-2022-panama-lanza-plan-accion-para-reduccion-sodio-eliminacion-grasas-trans-2022)
- 444 31. Trieu K, Coyle DH, Afshin A, Neal B, Marklund M, Wu JHY. The estimated health impact  
445 of sodium reduction through food reformulation in Australia: A modeling study. Adams J,  
446 ed. *PLOS Med*. 2021;18(10):e1003806. doi:10.1371/journal.pmed.1003806
- 447 32. Flexner N, Christoforou AK, Bernstein JT, et al. Estimating Canadian sodium intakes and the  
448 health impact of meeting national and WHO recommended sodium intake levels: A  
449 macrosimulation modelling study. Hennis AJM, ed. *PLOS ONE*. 2023;18(5):e0284733.  
450 doi:10.1371/journal.pone.0284733
- 451 33. Vega-Solano J, Blanco-Metzler A, Madriz-Morales K, Fernandes-Nilson EA, Labonté ME.  
452 Impact of salt intake reduction on CVD mortality in Costa Rica: A scenario modelling study.  
453 Garikipati VNS, ed. *PLOS ONE*. 2021;16(1):e0245388. doi:10.1371/journal.pone.0245388

Monitoring sodium content in packaged foods sold in the Americas and compliance with the PAHO 2021 regional sodium targets

- 454 34. Nilson EAF, Metzler AB, Labonté ME, Jaime PC. Modelling the effect of compliance with  
 455 WHO salt recommendations on cardiovascular disease mortality and costs in Brazil.  
 456 Shimosawa T, ed. *PLOS ONE*. 2020;15(7):e0235514. doi:10.1371/journal.pone.0235514
- 457 35. Charlton KE, Corso B, Ware L, et al. Effect of South Africa’s interim mandatory salt  
 458 reduction programme on urinary sodium excretion and blood pressure. *Prev Med Rep*.  
 459 2021;23:101469. doi:10.1016/j.pmedr.2021.101469
- 460 36. Nilson EAF, Pearson-Stuttard J, Collins B, et al. Estimating the health and economic effects  
 461 of the voluntary sodium reduction targets in Brazil: microsimulation analysis. *BMC Med*.  
 462 2021;19(1):225. doi:10.1186/s12916-021-02099-x
- 463 37. Nilson E, Spaniol A, Gonçalves V, et al. Sodium Reduction in Processed Foods in Brazil:  
 464 Analysis of Food Categories and Voluntary Targets from 2011 to 2017. *Nutrients*.  
 465 2017;9(7):742. doi:10.3390/nu9070742

466  
 467 **Appendix**

468 **Appendix A. Updated PAHO 2022 Regional Sodium Reduction Targets<sup>12</sup>**

| Category                                             | Description                               | mg sodium/100 g                                                                                                                                                 | mg sodium/kcal |
|------------------------------------------------------|-------------------------------------------|-----------------------------------------------------------------------------------------------------------------------------------------------------------------|----------------|
|                                                      |                                           | 2022 Target                                                                                                                                                     | 2022 Target    |
| <b>1. Bread, bread products and crisp breads</b>     |                                           |                                                                                                                                                                 |                |
| 1a                                                   | Pantry and hearth bread, rolls and buns   | Includes whole grain, whole wheat, wholemeal, white bread and buns.                                                                                             | 340 1.2        |
| 1b                                                   | Tortillas (wheat), wraps, naan, roti      | Includes plain or flavored flatbread, pita, roti, wheat-based tortillas, wraps or naan. Excludes tortillas made with corn (3a) and bread with additions (1c).   | 550 1.8        |
| 1c                                                   | Bread with additions                      | Includes breads with additions that contain sodium e.g., olives, onion, pieces of ham, raisins, tomatoes, butter/garlic, cheese, pandebono.                     | 420 1.5        |
| 1d                                                   | Other bread products                      | Includes bread products not captured in 1a-c, e.g., English muffins, bagels, dry bread, croutons, croissants, pizza crusts, etc.                                | 400 1.3        |
| <b>2. Cakes, biscuits, pastries and sweet breads</b> |                                           |                                                                                                                                                                 |                |
| 2a                                                   | Savory biscuits and crackers              | Plain or flavored crackers, sandwich crackers, puffed cakes, and graham crackers e.g., cheese crackers, soda crackers, and rice cakes. Excludes dry bread (1d). | 640 1.5        |
| 2b                                                   | Cookies and sweet biscuits                | Includes filled/coated and unfilled/uncoated sweet cookies and biscuits. Excludes graham crackers (2a) and crackers/savory biscuits (2a).                       | 225 0.5        |
| 2c                                                   | Pastries, squares, and quick/sweet breads | Filled/unfilled pastries, danishes, sweet buns, tea biscuits/scones, muffins, squares, brownies, quick/sweet breads.                                            | 260 0.7        |

Monitoring sodium content in packaged foods sold in the Americas and compliance with the PAHO 2021 regional sodium targets

|                            |                                                         |                                                                                                                                                                                                                                                                       |     |     |
|----------------------------|---------------------------------------------------------|-----------------------------------------------------------------------------------------------------------------------------------------------------------------------------------------------------------------------------------------------------------------------|-----|-----|
| 2d                         | Cakes                                                   | Cakes, cheesecakes, snack cakes. Includes prepared products and dry cake mixes (as consumed).                                                                                                                                                                         | 300 | 0.7 |
| <b>3. Corn derivatives</b> |                                                         |                                                                                                                                                                                                                                                                       |     |     |
| 3a                         | Tortillas (corn)                                        | Tortillas made from nixtamalized corn flour or cornmeal. Excludes tortillas made with wheat (1b).                                                                                                                                                                     | 35  | 0.9 |
| 3b                         | Biscuits (bizcochos)                                    | Flavored and unflavored salty biscuits and crackers made of corn flour, salt and cheese. Excludes extruded corn products.                                                                                                                                             | 825 | 1.6 |
| 3c                         | Tostadas                                                | Chips or crisp-type products, made from corn tortillas, flavored and unflavored, that have been either oil fried, air fried, oven fried or baked.                                                                                                                     | 720 | 2.6 |
| 3d                         | Arepas                                                  | Plain or savory flat (usually round), unleavened patty of soaked, ground kernels of corn, corn meal or corn flour that can be grilled, baked, fried, boiled or steamed. It may be savory.                                                                             | 50  | 0.5 |
| <b>4. Breakfast cereal</b> |                                                         |                                                                                                                                                                                                                                                                       |     |     |
| 4a                         | Ready to eat and hot instant breakfast cereals          | Granola, muesli, shredded, flaked, puffed, extruded, and high-fibre compact cereals. Includes plain and flavored hot instant cereals (dry mix, as sold) e.g. oatmeal. Excludes plain oatmeal and other traditional cereals cooked from scratch.                       | 260 | 0.6 |
| <b>5. Savoury snacks</b>   |                                                         |                                                                                                                                                                                                                                                                       |     |     |
| 5a                         | Nuts, seeds, and kernels, seasoned and candied          | Seasoned, salted, and candied nuts, seeds, and kernels e.g. salted sunflower seeds, BBQ peanuts, beer nuts, and trail mixes. Excludes unsalted products.                                                                                                              | 265 | 0.9 |
| 5b                         | Chips, popcorn, and/or extruded snacks                  | Potato, corn, tortilla, rice, and vegetable chips; extruded and puffed corn snacks; microwave and stovetop ready popcorn, and seasoned or candied ready to eat popcorn. Excludes unseasoned dry popcorn kernels.                                                      | 530 | 1.4 |
| 5c                         | Pretzels and snack mixes                                | Hard pretzels, candied pretzels, sesame sticks, and assorted salty snack mixes. Excludes trail mix (5a).                                                                                                                                                              | 800 | 1.8 |
| 5d                         | Other savory snacks                                     | Includes savory snacks not captured in 5a-c. e.g., plantain/yucca chips, kale chips, chips made with tropical root products.                                                                                                                                          | 525 | 0.9 |
| <b>6. Cheese</b>           |                                                         |                                                                                                                                                                                                                                                                       |     |     |
| 6a                         | Fresh cheese (i.e., fresh mozzarella and others)        | Includes fresh Mozzarella, turrialba and palmito (Costa Rica) and quesillo, queso de hebra, queso oaxaca (Mexican cheese), cheese curds.                                                                                                                              | 480 | 1.1 |
| 6b                         | Soft cheese (i.e., unripened goat cheese, cream cheese) | Plain and flavored (sweet or savory) cream cheese, cream cheese spreads, cream cheese-style products and soft unripened goat cheese. Excludes processed cheese (6e) and cream cheese-based dips (16h).                                                                | 420 | 0.7 |
| 6c                         | Semi-hard cheese (e.g., mozzarella, cheddar and others) | Includes semi-hard cheese such as mozzarella (including pasta filata), mild, medium and old cheddar, Swiss, Monterey Jack, brick, colby, gouda, brie, camembert, manchego, string cheese, and shredded mixed cheese. Excludes fresh mozzarella and cheese curds (6a). | 650 | 1.7 |

Monitoring sodium content in packaged foods sold in the Americas and compliance with the PAHO 2021 regional sodium targets

|                                                    |                                                                          |                                                                                                                                                                                                                                |      |      |
|----------------------------------------------------|--------------------------------------------------------------------------|--------------------------------------------------------------------------------------------------------------------------------------------------------------------------------------------------------------------------------|------|------|
| 6d                                                 | Hard cheese, grated and ungrated                                         | Shelf stable and refrigerated hard cheese (moisture content <35%) e.g. parmesan, manchego, pecorino, asiago, romano.                                                                                                           | 1300 | 2    |
| 6e                                                 | Processed cheese                                                         | Processed cheese products made from an emulsified blend of natural cheese. Includes processed cheese spreads, blocks, and slices with or without added ingredients. Excludes string cheese (6c) and cream cheese spreads (6b). | 1000 | 5.4  |
| <b>7. Processed vegetables, beans, and legumes</b> |                                                                          |                                                                                                                                                                                                                                |      |      |
| 7a                                                 | Tomato paste with additions                                              | Tomato paste with added ingredients e.g. tomato paste with herbs or garlic. Excludes plain tomato paste with no added salt.                                                                                                    | 400  | 3.3  |
| 7b                                                 | Canned vegetables                                                        | Canned vegetables and legumes e.g. potatoes, tomatoes, corn, peas, green beans, mushrooms, mixed vegetables, beets (plain and pickled). Excludes kidney beans, chickpeas, lentils (7c).                                        | 150  | 4    |
| 7c                                                 | Canned beans, chickpeas and lentils                                      | Boiled, whole, canned kidney beans, chickpeas, lentils. Excludes dry beans and lentils that are cooked or uncooked.                                                                                                            | 220  | 2.5  |
| 7d                                                 | Baked and refried beans (mashed)                                         | Shelf stable baked beans and refried beans (mashed beans). Products may include meat.                                                                                                                                          | 280  | 2.6  |
| 7e                                                 | Frozen potatoes and similar products                                     | Frozen plain and seasoned French fries, sweet potato fries, hash browns, potato patties, green plantain and tropical tubers such as cassava (yuca),                                                                            | 170  | N/A  |
| 7f                                                 | Dry mashed or scalloped potatoes (as consumed)                           | Dehydrated scalloped or mashed potatoes, as consumed.                                                                                                                                                                          | 290  | N/A  |
| 7g                                                 | Pickled vegetables                                                       | Shelf stable sour pickled vegetables e.g. cucumbers, onions, peppers, sauerkraut, and other vegetables. Also includes shelf stable sweet pickled vegetables e.g., cucumbers, onions, relish.                                   | 680  | 30.1 |
| 7h                                                 | Sundried tomatoes                                                        | Sundried tomatoes.                                                                                                                                                                                                             | 900  | 7.8  |
| 7i                                                 | Olives                                                                   | Shelf stable stuffed olives, unstuffed olives, and tapenade.                                                                                                                                                                   | 1300 | 9.9  |
| 7j                                                 | Vegetable juice                                                          | Vegetable juice and vegetable juice cocktail e.g. tomato juice, carrot juice, and tomato and clam juice. Excludes vegetable and fruit juice blends.                                                                            | 175  | 4.5  |
| <b>8. Processed meat and poultry</b>               |                                                                          |                                                                                                                                                                                                                                |      |      |
| 8a                                                 | Packaged deli meats – fully cooked                                       | Cooked deli meat e.g. smoked meat, pastrami, mortadella, bologna, corned beef, ham, sliced chicken and turkey, luncheon meat loaf, roast beef, cooked pepperoni, and cooked back bacon.                                        | 900  | 6.6  |
| 8b                                                 | Packaged dry-cured deli meats – dry cured, fermented, no thermal process | Dry cured, fermented deli meats which have not been thermally processed, e.g., salami and dried pepperoni. Excludes prosciutto (8g).                                                                                           | 1350 | 3.6  |
| 8c                                                 | Sausages - uncooked                                                      | Uncooked breakfast and dinner sausages e.g. pork, chicken and turkey. Excludes hot dogs and wieners (8d).                                                                                                                      | 600  | 2.5  |
| 8d                                                 | Sausages - cooked                                                        | Cooked breakfast and dinner sausages e.g., pork, chicken and turkey. Includes salchichon, wieners (hot dogs) and smoked or unsmoked sausages with or without cheese.                                                           | 840  | 3    |

Monitoring sodium content in packaged foods sold in the Americas and compliance with the PAHO 2021 regional sodium targets

|                                                                  |                                                                                                     |                                                                                                                                                                                                                                                                                       |     |     |
|------------------------------------------------------------------|-----------------------------------------------------------------------------------------------------|---------------------------------------------------------------------------------------------------------------------------------------------------------------------------------------------------------------------------------------------------------------------------------------|-----|-----|
| 8e                                                               | Uncooked bacon – belly                                                                              | Uncooked belly bacon. Excludes back bacon, bacon substitutes, and pre-cooked shelf stable bacon.                                                                                                                                                                                      | 700 | 1.4 |
| 8f                                                               | Burgers, meatballs, meatloaf and breaded meat and poultry                                           | Meat and poultry burgers, meatballs and meatloaf, and breaded meat products e.g. products with cheese, breaded and unbreaded burgers, strips, nuggets/fingers, chicken burgers, chicken balls, schnitzel, and cutlets.                                                                | 540 | 2   |
| 8g                                                               | Ham, canned meat and poultry, and uncooked, pickled, cured and smoked meats that are not deli meats | Picnic and roast ham, cottage rolls, prosciutto, back bacon, peameal bacon and turkey-bacon strips. Also includes uncooked pickled, corned, cured or smoked meats. Includes canned meat and poultry. Excludes canned fish (9a), uncooked belly bacon (8e) and deli meats (8a and 8b). | 915 | 4.1 |
| 8h                                                               | Patés and meat spreads                                                                              | Patés and spreads e.g., creton and liverwurst. Excludes fish patés and spreads.                                                                                                                                                                                                       | 720 | 2.4 |
| <b>9. Processed fish and seafood</b>                             |                                                                                                     |                                                                                                                                                                                                                                                                                       |     |     |
| 9a                                                               | Canned fish                                                                                         | Canned fish or shellfish packed in water, oil or sauce e.g., salmon, tuna, sardines, mackerel, shrimp, crab, clams, smoked oysters, anchovies, fish salad.                                                                                                                            | 320 | 2.2 |
| 9b                                                               | Frozen plain fish and seafood with added sodium phosphate                                           | Frozen plain fish and seafood with added sodium phosphate.                                                                                                                                                                                                                            | 350 | 3.1 |
| 9c                                                               | Fish and seafood cakes, fingers or burgers, seasoned, and breaded or battered or with sauces        | Fish and seafood cakes and burgers, seasoned, with sauce or seasoning, breaded or battered, and stuffed fish.                                                                                                                                                                         | 310 | 1.7 |
| 9d                                                               | Smoked, salted, pickled and kippered fish                                                           | Smoked fish e.g., smoked salmon, smoked rainbow trout; pickled fish; salted fish, and; kippered fish e.g., kippered herring, dried and salted cod.                                                                                                                                    | 540 | 2.6 |
| <b>10. Soy products and meat alternatives</b>                    |                                                                                                     |                                                                                                                                                                                                                                                                                       |     |     |
| 10a                                                              | Seasoned tofu and tempeh                                                                            | Savory, marinated, and seasoned tofu and tempeh. Excludes plain tofu, tofu-based desserts and plain tempeh.                                                                                                                                                                           | 350 | 2   |
| 10b                                                              | Meat analogues and other meat alternatives                                                          | Frozen and refrigerated meat analogues e.g. veggie patties, burgers, veggie dogs, meatballs, and deli-style slices.                                                                                                                                                                   | 410 | 2.5 |
| <b>11. Soups</b>                                                 |                                                                                                     |                                                                                                                                                                                                                                                                                       |     |     |
| 11a                                                              | Wet and dry soups (as consumed)                                                                     | Canned condensed, ready-to-serve, or dry cream and broth-based soups, broth, stock and consommé. As consumed. Excludes bouillon (16a).                                                                                                                                                | 260 | 9.2 |
| 11b                                                              | Noodles in broth (as consumed)                                                                      | Includes fresh and instant noodles with soup, broth or seasoning e.g. instant oriental noodle soups. Excludes shelf stable pasta with sauce or seasonings (12c)                                                                                                                       | 330 | 5.2 |
| <b>12. Ready-made foods, convenience foods, and mixed dishes</b> |                                                                                                     |                                                                                                                                                                                                                                                                                       |     |     |
| 12a                                                              | Canned chili                                                                                        | Shelf stable vegetarian and meat chili.                                                                                                                                                                                                                                               | 260 | 2.5 |

Monitoring sodium content in packaged foods sold in the Americas and compliance with the PAHO 2021 regional sodium targets

|                                                             |                                                                                   |                                                                                                                                                                                                                                                                                                                                                                                                 |       |     |
|-------------------------------------------------------------|-----------------------------------------------------------------------------------|-------------------------------------------------------------------------------------------------------------------------------------------------------------------------------------------------------------------------------------------------------------------------------------------------------------------------------------------------------------------------------------------------|-------|-----|
| 12b                                                         | Canned stew and meatballs                                                         | Shelf stable stew, meatballs, and curries.                                                                                                                                                                                                                                                                                                                                                      | 470   | 3.2 |
| 12c                                                         | Pasta, noodles, rice or grains with sauce or seasonings<br><br>(as consumed)      | As consumed. Shelf stable pasta (dry mix, as consumed) and ready-to-eat, noodles, and rice or grain mixes with sauce or seasonings, as consumed e.g. macaroni with cheese sauce, noodles in tomato sauce, and teriyaki noodles. Excludes refrigerated or frozen pasta dishes (12h), noodles in broth (11b) and plain dry or cooked pasta without additions (13a), and frozen pasta dishes (12h) | 330   | 1.9 |
| 12d                                                         | Pasta, noodles, rice or grains with sauce or seasonings<br><br>(dry mix, as sold) | Dry mixes, as sold. Shelf stable pasta, noodles, and rice or grain mixes with sauce or seasonings e.g. macaroni with cheese sauce, noodles in tomato sauce, and teriyaki noodles. Excludes noodles in broth (11b) and plain dry or cooked pasta without additions (13a).                                                                                                                        | 870   | 2.6 |
| 12e                                                         | Stuffing mixes (as consumed)                                                      | Shelf stable stuffing mixes, as consumed. Excludes refrigerated stuffing.                                                                                                                                                                                                                                                                                                                       | 470   | N/A |
| 12f                                                         | Pizza and pizza snacks                                                            | Frozen and refrigerated pizza, pizza snacks, calzones.                                                                                                                                                                                                                                                                                                                                          | 500   | 1.9 |
| 12g                                                         | Sandwiches                                                                        | Fresh or frozen sandwiches with or without meat. Includes sandwich wraps and burritos.                                                                                                                                                                                                                                                                                                          | 500   | 1.9 |
| 12h                                                         | Refrigerated or frozen appetizers, sides and entrees                              | Refrigerated or frozen entrées, meal sides, meal centers, frozen pasta mains/sides, and appetizers. Includes empanadas. Excludes pizza and pizza snacks (12f) and sandwiches (12g).                                                                                                                                                                                                             | 575   | 1.7 |
| <b>13. Fresh or dried plain pasta and noodles</b>           |                                                                                   |                                                                                                                                                                                                                                                                                                                                                                                                 |       |     |
| 13a                                                         | Plain pasta and noodles (as consumed or dry, uncooked)                            | Plain dry or uncooked pasta, as consumed. Excludes pasta with sauce or seasonings (12c) and noodles in broth (11b).                                                                                                                                                                                                                                                                             | 0     | 0   |
| <b>14. Granola and energy bars, and nut butters/spreads</b> |                                                                                   |                                                                                                                                                                                                                                                                                                                                                                                                 |       |     |
| 14a                                                         | Granola, cereal and energy bars                                                   | Granola bars (plain and coated), energy bars, sweet and salty bars, fruit filled bars, and muffin-type bars. Excludes sweet and salty bars (see 1n), and infant and toddler snack bars.                                                                                                                                                                                                         | 170   | 0.5 |
| 14b                                                         | Nut butters and nut spreads                                                       | Nut butters and nut spreads e.g., peanut, almond, cashew, soy, hazelnut cocoa spread. Excludes unsalted nut butters and tahini.                                                                                                                                                                                                                                                                 | 330   | 0.3 |
| <b>15. Fats and oils</b>                                    |                                                                                   |                                                                                                                                                                                                                                                                                                                                                                                                 |       |     |
| 15a                                                         | Salted butter, margarine, and butter blends                                       | Plain and flavored butter, margarine and butter blends. Excludes unsalted butter and margarine.                                                                                                                                                                                                                                                                                                 | 510   | 0.8 |
| 15b                                                         | Mayonnaise                                                                        | Plain and flavored mayonnaise and mayonnaise-type spreads and dressings. Includes low fat and fat-free versions, and oil-based sandwich spreads.                                                                                                                                                                                                                                                | 670   | 2.3 |
| 15c                                                         | Salad dressing & vinaigrette                                                      | Refrigerated and shelf stable oil and vinegar-based dressings, creamy dressings. Includes dry mix salad dressing, as consumed. Includes low fat and fat-free versions.                                                                                                                                                                                                                          | 800   | 2.3 |
| <b>16. Sauces, dips, gravy and condiments</b>               |                                                                                   |                                                                                                                                                                                                                                                                                                                                                                                                 |       |     |
| 16a                                                         | Bouillon cubes and powders (as sold)                                              | Bouillon cubes and powders, as sold.                                                                                                                                                                                                                                                                                                                                                            | 18000 | 68  |

Monitoring sodium content in packaged foods sold in the Americas and compliance with the PAHO 2021 regional sodium targets

|     |                                                          |                                                                                                                                                                                                                                                                         |       |      |
|-----|----------------------------------------------------------|-------------------------------------------------------------------------------------------------------------------------------------------------------------------------------------------------------------------------------------------------------------------------|-------|------|
| 16b | Pasta sauce                                              | Shelf stable, refrigerated, frozen, and dry mix pasta sauces including those that are tomato, cream or cheese-based (e.g., alfredo sauce). As consumed. Includes pizza sauce.                                                                                           | 330   | 4.5  |
| 16c | Pesto                                                    | Shelf stable and refrigerated pesto e.g., basil or sun-dried tomato pesto.                                                                                                                                                                                              | 800   | 1.9  |
| 16d | Tomato sauce                                             | Shelf stable plain or flavored tomato sauce. Excludes tomato-based pasta sauces (16b) and tomato paste (7a).                                                                                                                                                            | 300   | 5.7  |
| 16e | Ketchup and similar tomato-type condiments (as consumed) | Shelf stable condiments e.g., ketchup, tomato-based chili sauce, seafood sauce, BBQ sauce, steak sauce, chutney. Excludes relish (7g), mustard (16f) and mayonnaise (15b).                                                                                              | 800   | 7.1  |
| 16f | Mustard                                                  | Mustards including yellow, Dijon, honey mustard, spicy brown mustard.                                                                                                                                                                                                   | 1000  | 10.2 |
| 16g | Spicy sauce                                              | Red, green, ranchera sauces, pepper sauce, chilero, salsa picante, sriracha, chili picante, salsa de aji/rocoto.                                                                                                                                                        | 1100  | 21.4 |
| 16h | Gravy, cooking sauces, dips, and salsa (as consumed)     | Shelf stable, refrigerated and dry mix gravy, cooking sauces, as consumed e.g., hollandaise, curry, and stir-fry sauces, and salsa. Includes vegetable, legume, and dairy-based dips (i.e., cream cheese and sour cream-based dips). As consumed. Excludes curry paste. | 350   | 3.5  |
| 16i | Sweet oriental sauces                                    | Sweet oriental sauces e.g. plum sauce, cherry sauce, pineapple sauce, and sweet and sour sauce. Excludes salty oriental sauces (16j).                                                                                                                                   | 220   | 1.3  |
| 16j | Soya and other salty oriental sauces                     | Oriental sauces e.g. soya, teriyaki, black bean, fish, hoisin, peanut sauce. Excludes stir-fry sauce (16h), marinades (16k), and sweet oriental sauces (16i).                                                                                                           | 2900  | 9.9  |
| 16k | Marinades (as consumed)                                  | Shelf stable and dry marinade mixes. As consumed.                                                                                                                                                                                                                       | 1800  | 14.2 |
| 16l | Dry seasoning mixes for rice and side dishes             | Dry seasoning mixes for side and main dishes, as sold e.g. chili, stew, fajita, and salad seasoning. Includes popcorn seasoning.                                                                                                                                        | 10000 | 13.1 |
| 16m | Dry seasoning mixes for meat and fish                    | Dry seasoning for meat, poultry and fish e.g., steak spice.                                                                                                                                                                                                             | 10000 | 27.9 |

469

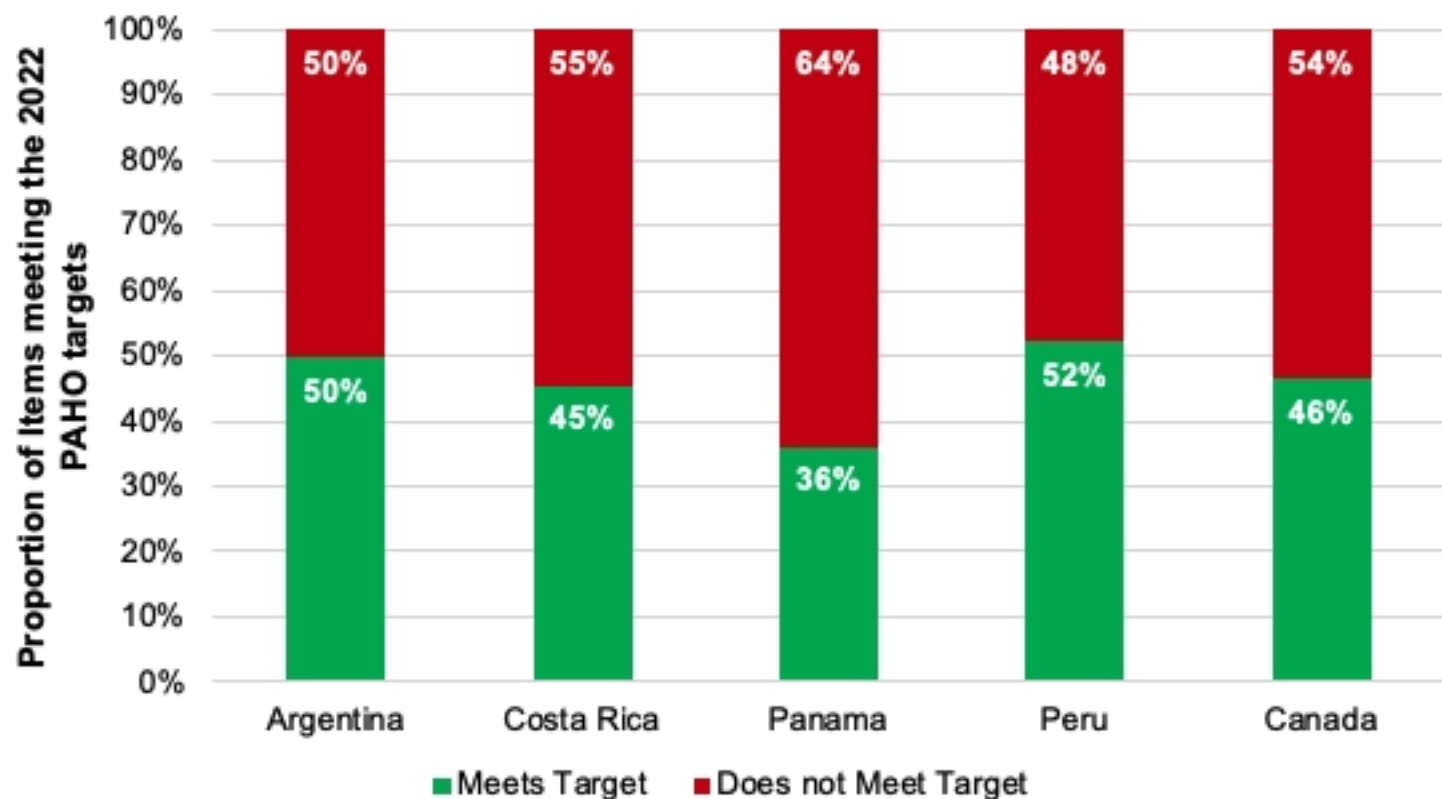

*Note: Updated PAHO targets were set in 2021 for 2022 (interim) and 2025 targets<sup>12</sup>. Data were compared against the 2022 interim targets*

Fig 1



**A**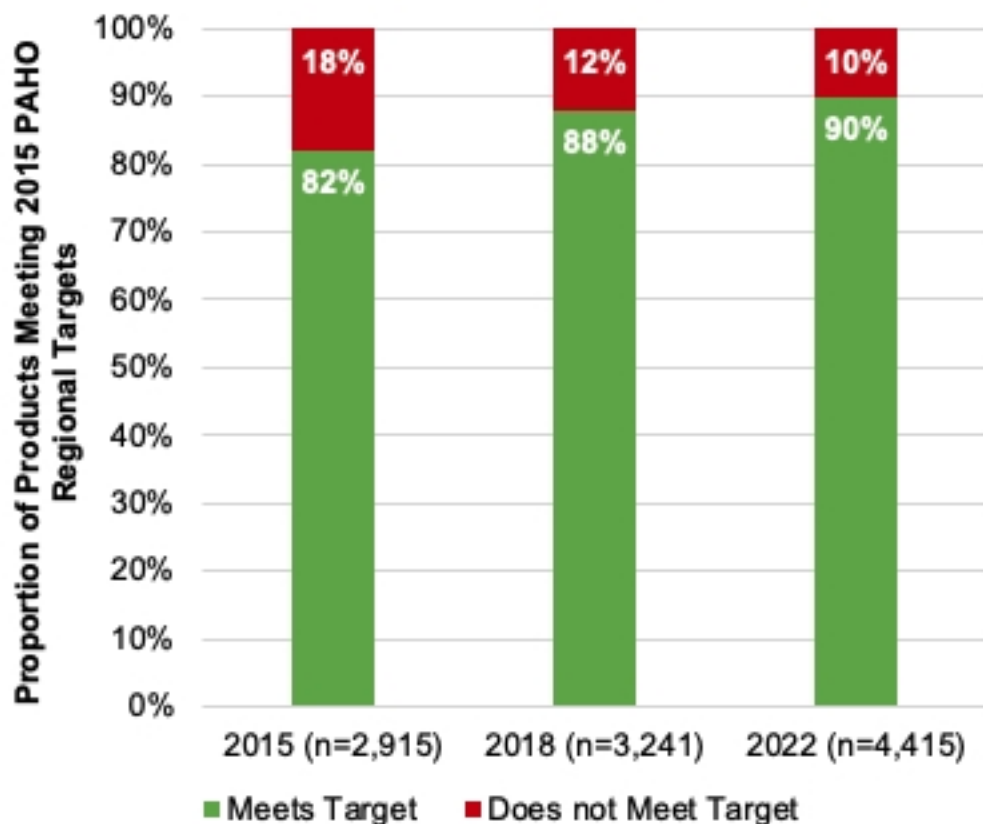**B**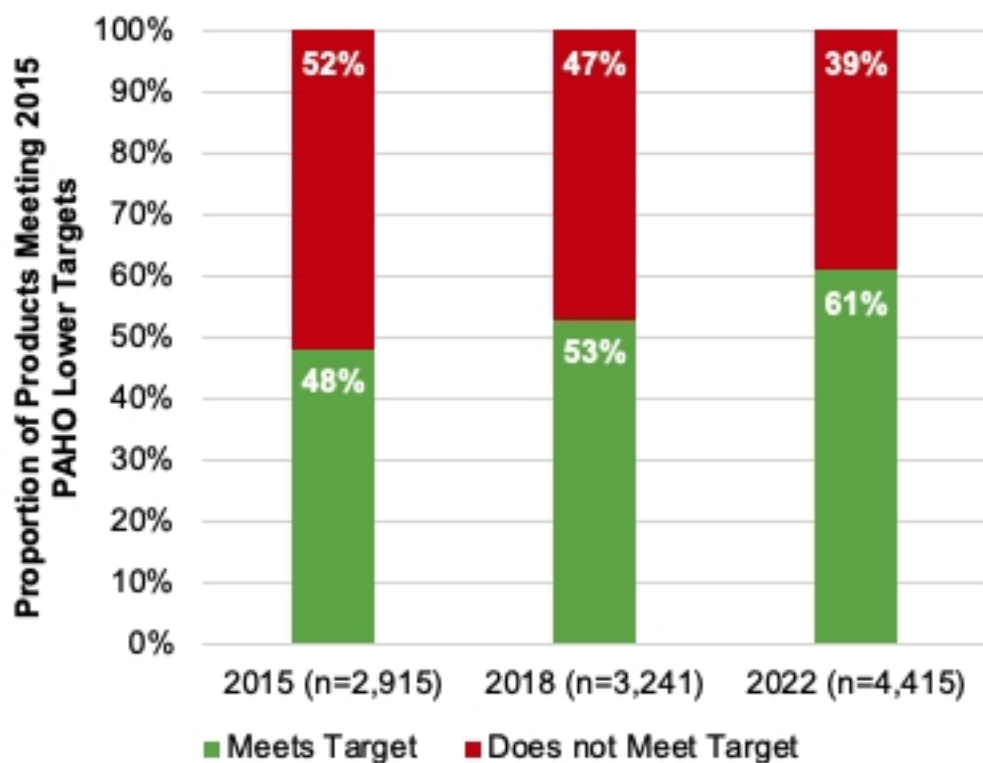**Fig 2**

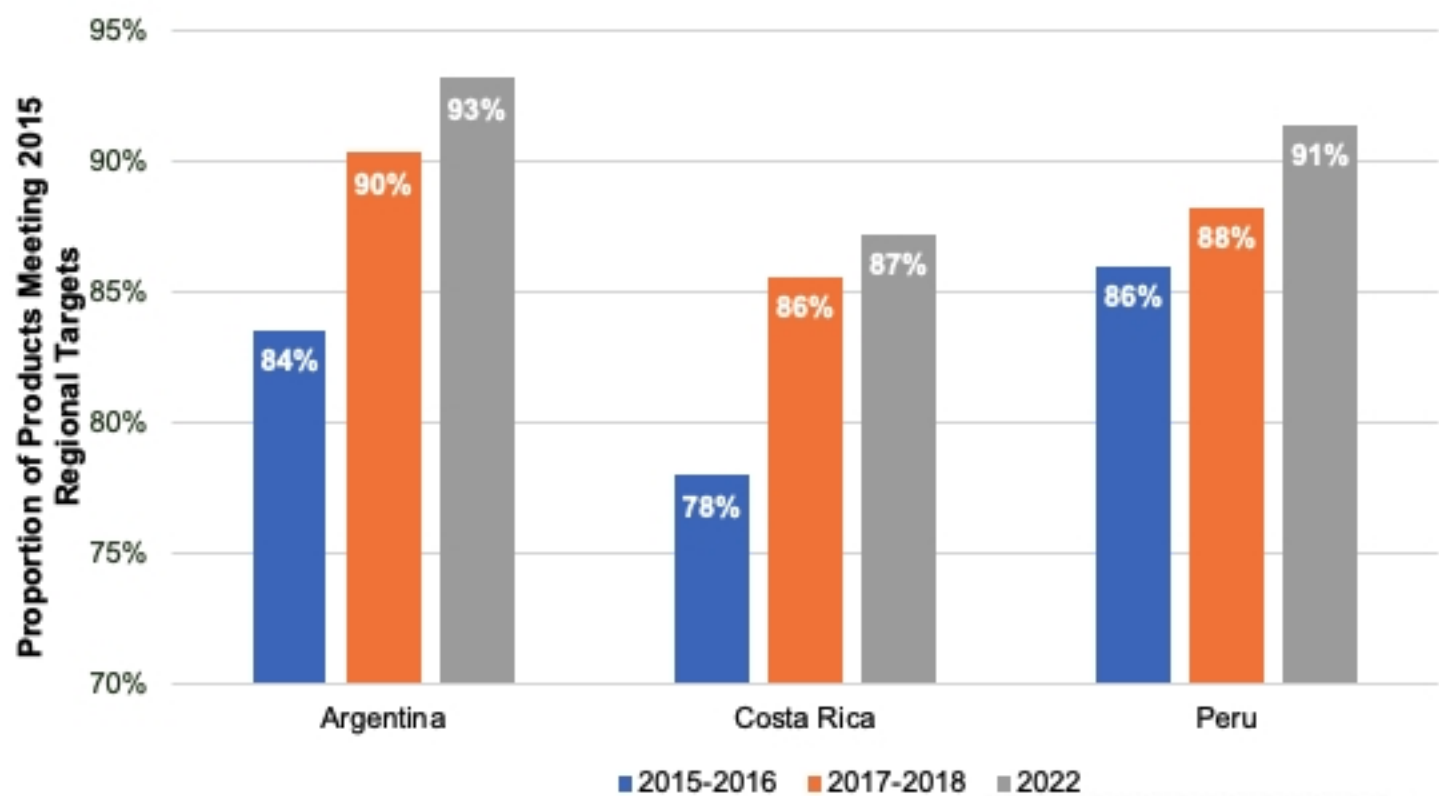

Fig 3
